# Supplementary material for: Association of allergic diseases with children’s life satisfaction: population-based study in Finland
Source: PubMed Central journal article supplement — BMJ Open. 2018 Mar 30;8(3):e019281. doi: 10.1136/bmjopen-2017-019281 (PMC5884348; doi:10.1136/bmjopen-2017-019281), 2018-03-30
Supplement: bmjopen-2017-019281.draft_revisions.pdf [file bmjopen-2017-019281.draft_revisions.pdf]

# BMJ Open

BMJ Open is committed to open peer review. As part of this commitment we make the peer review history of every article we publish publicly available.

When an article is published we post the peer reviewers' comments and the authors' responses online. We also post the versions of the paper that were used during peer review. These are the versions that the peer review comments apply to.

The versions of the paper that follow are the versions that were submitted during the peer review process. They are not the versions of record or the final published versions. They should not be cited or distributed as the published version of this manuscript.

BMJ Open is an open access journal and the full, final, typeset and author-corrected version of record of the manuscript is available on our site with no access controls, subscription charges or pay-per-view fees (<http://bmjopen.bmj.com>).

If you have any questions on BMJ Open's open peer review process please email [info.bmjopen@bmj.com](mailto:info.bmjopen@bmj.com)

# BMJ Open

## Active allergic disease diminishes life satisfaction in childhood: population-based study

|                                 |                                                                                                                                                                                                                                                                                                                                                                                        |
|---------------------------------|----------------------------------------------------------------------------------------------------------------------------------------------------------------------------------------------------------------------------------------------------------------------------------------------------------------------------------------------------------------------------------------|
| Journal:                        | <i>BMJ Open</i>                                                                                                                                                                                                                                                                                                                                                                        |
| Manuscript ID                   | bmjopen-2017-019281                                                                                                                                                                                                                                                                                                                                                                    |
| Article Type:                   | Research                                                                                                                                                                                                                                                                                                                                                                               |
| Date Submitted by the Author:   | 08-Sep-2017                                                                                                                                                                                                                                                                                                                                                                            |
| Complete List of Authors:       | Haanpää, Leena; Leena Haanpää; Leena Haanpää af Ursin, Piia; Turun yliopisto Kliininen laitos, Child and Youth Research Institute<br>Kaljonen, Anne; Turun Yliopisto, Department of Biostatistics<br>Nermes, Merja; Turun yliopisto Kliininen laitos, Department of Paediatrics<br>Isolauri, Erika; Turun yliopisto Kliininen laitos, Department of Pediatrics and Adolescent Medicine |
| <b>Primary Subject Heading</b>: | Dermatology                                                                                                                                                                                                                                                                                                                                                                            |
| Secondary Subject Heading:      | Dermatology                                                                                                                                                                                                                                                                                                                                                                            |
| Keywords:                       | Eczema < DERMATOLOGY, Paediatric dermatology < DERMATOLOGY, Paediatric dermatology < PAEDIATRICS                                                                                                                                                                                                                                                                                       |
|                                 |                                                                                                                                                                                                                                                                                                                                                                                        |

SCHOLARONE™  
Manuscripts

Only

# Active allergic disease diminishes life satisfaction in childhood: population-based study

Leena Haanpää, Piia af Ursin, Merja Nermes, Anne Kaljonen, Erika Isolauri

Child and Youth Research Institute, Institute of Clinical Medicine, University of Turku, FI-20014 Turku, Finland Leena Haanpää senior researcher; Child and Youth Research Institute, University of Turku, FI-20014 Turku, Finland Piia af Ursin researcher; Department of Paediatric and Adolescent Medicine, Turku University Hospital, Finland, FI-20521 Turku, Finland Merja Nermes MD, PhD; Faculty of Medicine, Department of Biostatistics, University of Turku, 20014 FI-Turku, Finland Anne Kaljonen bio-statistician; Department of Paediatrics, Institute of Clinical Medicine, University of Turku, 20014 FI-Turku, Finland, Department of Pediatrics and Adolescent Medicine, Turku University Hospital, FI-20521 Turku, Finland Erika Isolauri Professor

**Correspondence to:** lehaan@utu.fi

The Corresponding Author has the right to grant on behalf of all authors and does grant on behalf of all authors, a worldwide licence to the Publishers and its licensees in perpetuity, in all forms, formats and media (whether known now or created in the future), to i) publish, reproduce, distribute, display and store the Contribution, ii) translate the Contribution into other languages, create adaptations, reprints, include within collections and create summaries, extracts and/or, abstracts of the Contribution, iii) create any other derivative work(s) based on the Contribution, iv) to exploit all subsidiary rights in the Contribution, v) the inclusion of electronic links from the Contribution to third party material wherever it may be located; and, vi) licence any third party to do any or all of the above.

**Number of words:** 3622

## Abstract

**Objective:** To assess the impact of allergic diseases on the subjective well-being and life satisfaction of primary school children.

**Design:** Population-based cohort.

**Setting:** Finnish sample of children aged 10 and 12 from the International Survey of Children's Well-Being.

**Participants:** Nationally representative sample of 1947 school children.

**Main outcome measure:** Two different instruments to assess the child's own perception of well-being; the short version of Student Life Satisfaction Scale (SLSS) and the Brief Multidimensional Student Life Satisfaction Scale (BMSLSS).

**Results:** Altogether 51,4% of children reported having at least one allergic condition (10,1% asthma, 23,8% eczema, and 40,3% seasonal allergic rhinitis). A distinction in life satisfaction emerged between non-allergic and allergic children, significantly inferior in the latter. In particular, children with eczema were more likely to report a reduction in life satisfaction compared to non-allergic children (SLSS  $\beta = -128.220$ ; BMSLSS  $\beta = -90.694$ ;  $p < 0.01$ ). Apart from freedom from eczema, good life satisfaction was associated with a physically active life style.

**Conclusions:** Active allergic disease reduces the child's own perception of well-being. During clinical visits, more attention should be paid to the psychosocial status and children's impairments which may differ substantially from those of parents or medical authorities.

**Keywords:** allergy; asthma; eczema; life satisfaction, physical activity

### Strengths and limitations of this study

- The first nationally representative survey on well-being and quality of life in primary-school children revealed that active allergic disease is a major determinant of children's well-being in various domains.
- The study did not directly and objectively assess the symptoms in question. The research focus was on children's own perception of life-satisfaction, not on disease severity.
- The questionnaire was administered only to the children, the responses not being corroborated by parents or medical experts. However, ten-year-old children are already capable of answering reliably to surveys.
- The data of the present study are cross-sectional, and any causal relationship between the predictors and outcome variables thus remains obscure.

## INTRODUCTION

Societies worldwide are faced with a progressively increasing risk of immune-mediated health problems such as allergic, autoimmune and inflammatory disease, the velocity of propagation being highest in children. Allergic diseases, the first manifestation of these conditions, comprise the most common chronic disease in childhood, with a prevalence ranging from 7% (eczema) to 14.6% (asthma and rhinitis) in 13-14-year –old children.<sup>1</sup> Thus, allergic diseases hold a key position regarding the burden not only for society and the family, but also for the affected individual.

The severity of allergic disease is assessed by the extent of symptoms in daily life. A vicious circle of symptoms of allergic disease such as allergy flares and emotional stress has been documented, potentially contributing to the burden of disease as experienced.<sup>2</sup> Despite a growing interest in life satisfaction during childhood, little is known as to how chronic diseases such as asthma or eczema affect children's subjective well-being (SWB), this comprising psychosocial contentment. In fact, the burden of allergic disorders may extend well beyond mere physical functioning. The importance of the disease burden may culminate in children, whose recognition of self and self-esteem is still evolving, with a long-term impact on personal well-being and quality of life.

The objective of the present study was to assess the impact of allergic diseases on subjective well-being and life satisfaction in primary-school children. Conventionally, children's well-being has been determined indirectly, using proxies such as household income, mortality, life expectancy, or using parental reports on child well-being<sup>3 4</sup> thus ignoring the child's own point of view.

Recent research has provided tools as indicators of self-reported perceptions of quality of life, satisfaction or other emotional and behavioural elements in children's

1  
2  
3 lives.<sup>5</sup> In context of allergic diseases, we applied for the first time two summary  
4  
5 measures of life satisfaction; the Student Life Satisfaction Scale (SLSS, measure of  
6  
7 children's overall life satisfaction) and the Brief Multidimensional Student Life  
8  
9 Satisfaction Scale (BMSLSS, measure of children's overall life satisfaction).<sup>5 6 7</sup>  
10  
11

## 12 13 **METHODS**

### 14 15 16 17 **Study population and setting**

18  
19 This study is part of an international Children Worlds survey (<http://www.isciweb.org>).<sup>8</sup>  
20  
21 The Ethics Committee of the University of Turku has approved the study in a statement  
22  
23 obtained 15.2.2016. Cross-sectional data collected in Finland were used, comprising  
24  
25 randomly selected, nationally representative data from 43 primary schools (4<sup>th</sup> graders  
26  
27 35, 6<sup>th</sup> graders 39 classes). Informed consent was obtained from the participants before  
28  
29 the survey. Finally, in each school at least 40 pupils from both grades (4<sup>th</sup> and 6<sup>th</sup>) were  
30  
31 recruited. In total, 1947 pupils (67.6% response rate, 48.7% boys, mean age 11 years)  
32  
33 completed an online anonymous questionnaire.  
34  
35  
36  
37  
38  
39

### 40 41 **Outcome variables**

#### 42 Global life satisfaction

43  
44 A reduced version of Huebner's<sup>5</sup> SLSS was incremented with one item assessing  
45  
46 children's overall life satisfaction, adapted from Diener<sup>6</sup>. The SLSS hypothesizes that  
47  
48 children are able to formulate judgments of their overall life satisfaction, over and  
49  
50 above judgments concerning specific domains (e.g., family, friends, community)<sup>5</sup>.  
51  
52 Instead of dissatisfaction and negative life judgments, the SLSS focuses on positive,  
53  
54  
55  
56  
57  
58  
59  
60

1  
2  
3 affective conceptualizations of how life is going. This provides complementary  
4  
5 information on children's own perception of their optimal development.  
6  
7

### 8 9 Domain-specific life satisfaction

10  
11 The BMSLSS<sup>7</sup> measures satisfaction in life in more general terms than the SLSS. The  
12  
13 evaluation comprises five important life domains: family life, friendships, school  
14  
15 experience, body image, and child's living environment.  
16

17  
18 In both scales the scoring system was modified from the original version ('Not at all  
19  
20 agree' to 'Totally agree') to an 11-point scale (0-10). A higher score reflects higher life  
21  
22 satisfaction. By calculating the mean of all five items, subscales were summed and  
23  
24 transformed into a scale of 0-100.  
25

26  
27 SLSS and BMSLSS are validated measures of children's experiences of life  
28  
29 satisfaction by scales including psychometric properties targeted to age groups from 8  
30  
31 to 18 years. These measures have been successfully used in experience sampling  
32  
33 studies; however, to date only few studies have assessed them in the context of chronic  
34  
35 conditions.<sup>9 10</sup>  
36  
37

### 38 39 **Characterizing the allergic conditions**

40  
41 Three questions, modified from ISAAC Phase One core questionnaires investigating the  
42  
43 prevalence of doctor-diagnosed asthma, allergic rhinitis and eczema in children  
44  
45 worldwide,<sup>11</sup> were used to recognize allergic disease in this general population. The  
46  
47 children were asked if they used inhaled asthma medication (no/yes use of inhalator)  
48  
49 prescribed by a doctor. In like manner, the presence of itchy rash sometimes appearing  
50  
51 and disappearing (no/yes) was inquired and interpreted to represent atopic eczema. The  
52  
53  
54  
55  
56  
57  
58  
59  
60



1  
2  
3 manifestation of runny or blocked nose and sneezing in seasons of birch pollen or hay  
4  
5 (no/yes allergic cold) was considered to represent seasonal allergic rhinitis in Finland.  
6  
7

### 8 9 **Data on background variables**

10  
11 Self-reported sex, age, immigration and parent's employment status were used as socio-  
12  
13 demographic background variables. Additionally, we used data on pets (a pet in the  
14  
15 family when born or currently in the household). After-school physical activity (sports  
16  
17 or exercising) was self-reported.  
18  
19

### 20 21 22 **Statistical analysis**

23  
24 Continuous non-normally distributed outcome variables SLSS and BMSLSS were  
25  
26 characterized using means, standard deviations, medians and mean ranks, which were  
27  
28 used instead of original values for outcome variables in all analyses. Student's t-test for  
29  
30 independent samples was applied in comparisons. In the second phase the significant  
31  
32 background variables on either SLSS or BMSLSS and all five asthma variables were  
33  
34 taken for linear regression analysis. The interactions were evaluated, but excluded as  
35  
36 non-significant from the final regression models. Imputation of the data was not applied  
37  
38 to statistical analysis. Statistical analyses were carried out using SAS for Windows  
39  
40 version 9.4 (SAS, Cary, NC, USA) and p-values below 0.05 were considered  
41  
42 statistically significant.  
43  
44  
45  
46  
47

## 48 **RESULTS**

49  
50 Overall, the Finnish children here evaluated their wellbeing as excellent; more than  
51  
52 80% of 10- and 12-years-olds are very satisfied with their lives. Altogether 51,4%  
53  
54 (n=965) reported having at least one allergic disease; 10,1% (n=188) doctor-diagnosed  
55  
56  
57  
58  
59

1  
2  
3 asthma, 23,8% (n=452) eczema, and 40,3% (n=769) seasonal allergic rhinitis, while 3%  
4  
5 (n=61) of the sample reported having all these allergic conditions.

6  
7 A significant difference in life satisfaction emerged between non-allergic and  
8  
9 allergic children on both scales (Table 1). In particular, eczema was associated with  
10  
11 reduced well-being as compared with children not manifesting atopic eczema: for SLSS  
12  
13 ( $p < .001$ ) and for BMSLSS ( $p < .01$ ). In contrast, no associations were detected  
14  
15 between asthma or allergic rhinitis and life satisfaction. It is of note that all subjects  
16  
17 with an asthma diagnosis were on appropriate medication.

18  
19  
20 The determinants of good life satisfaction were measured by a multivariable  
21  
22 model (Table 2). Children not having eczema, aged 10 years (grade 4), having working  
23  
24 parents and a physically active life style were found to be more satisfied with their lives  
25  
26 than other children. Having had pets in early infancy or having pets currently had no  
27  
28 impact on life satisfaction.

29  
30  
31 Taken together, the strongest predictor of good life satisfaction was a physically  
32  
33 active life style ( $\beta = 194.05$ ,  $p < .001$ ), while reduced life satisfaction was explained by  
34  
35 eczema ( $\beta = -128.22$ ,  $p < .001$ ).

## 36 37 38 39 **DISCUSSION**

40  
41  
42  
43 This first nationally representative survey on well-being and quality of life in primary-  
44  
45 school children revealed that active allergic disease is a major determinant of children's  
46  
47 well-being in various domains. In particular, eczema was seen to reduce both the global  
48  
49 life satisfaction related to children's moods and feelings (SLSS) and life satisfaction as  
50  
51 measured in broader terms of living (BMSLSS). In accord with national<sup>12</sup> and  
52  
53  
54  
55  
56  
57  
58  
59  
60

1  
2  
3 international<sup>13</sup> reports, half of the children in the present general population reported  
4  
5 having at least one allergic condition, indicating that our results may be generalizable.  
6

7 Not only do allergic diseases comprise the most common chronic disorder of  
8  
9 childhood;<sup>14</sup> they also represent the first manifestation of the growing epidemic of non-  
10  
11 communicable diseases<sup>15</sup> which tend to share environmental risk factors and  
12  
13 pathomechanisms and frequently coexist.<sup>16 17 18</sup> Besides their well-known economic  
14  
15 burden, chronic diseases exert a substantial psychosocial impact on children and their  
16  
17 families. This notwithstanding, health-related quality of life research has only recently  
18  
19 attracted scientific interest.<sup>19 20 20</sup>

21  
22 The importance of life satisfaction may culminate in childhood. Children,  
23  
24 specifically on the very edge of puberty, are vulnerable to exterior influences such as  
25  
26 peer acceptance.<sup>21</sup> This phase of life is especially important as regards self-acceptance  
27  
28 and relation to self. Specifically, the increase in sensitivity to social rejection during  
29  
30 adolescence is associated with mental disorders such as depression.<sup>22</sup> Previous studies  
31  
32 mainly on the adult population indicate that active allergic diseases are related to  
33  
34 lowered well-being, manifested in fewer relationships, limited daily functioning and  
35  
36 decreased self-acceptance, and the emotions.<sup>23 19 24 20</sup> Our results further underline that  
37  
38 allergic diseases not only affect separate domains of children's lives but also entail a  
39  
40 holistic effect; the intricacy of the allergic burden is manifested in children's overall life  
41  
42 satisfaction. For example, skin conditions distress psychosocial well-being by virtue of  
43  
44 the stigma resulting from the visibility of dermatological symptoms.<sup>24</sup> Furthermore,  
45  
46 children with persistent or late-onset eczema or with persistent wheeze were  
47  
48 demonstrated to have psychosocial problems at school.<sup>20</sup>

49  
50  
51  
52 In the present study, respiratory allergy seemed to have less influence on  
53  
54 children's life-satisfaction as compared to eczema. An alternative explanation would be  
55  
56  
57  
58  
59

1  
2  
3 that the lacking effects rather designate these symptoms as treatable. Interestingly,  
4  
5 previous studies suggest that symptom-free patients report even better well-being than  
6  
7 the population in average,<sup>25</sup> suggesting that it is not the chronic disease *per se* which  
8  
9 impacts on the quality of life of the affected, but the manifestations thereof. Treating  
10  
11 asthma promotes a physically active life style,<sup>26</sup> and a physically active life style was  
12  
13 strongly associated with life satisfaction in the present survey. Thus, the benefit of  
14  
15 balanced asthma treatment may extend far beyond physical health to psychosocial  
16  
17 consequences and overall improvements in the quality of life.<sup>27</sup>

18  
19  
20 Several limitations of this study need to be acknowledged. Firstly, the study did  
21  
22 not directly and objectively assess the symptoms in question. In point of fact, the  
23  
24 research focus was on children's own perception of life-satisfaction, not on disease  
25  
26 severity. Secondly, the questionnaire was administered only to the children, the  
27  
28 responses not being corroborated by parents or medical experts. However, ten-year-old  
29  
30 children are already capable of answering reliably to surveys.<sup>8</sup> Lastly, the data of the  
31  
32 present study are cross-sectional, and any causal relationship between the predictors and  
33  
34 outcome variables thus remains obscure.

35  
36  
37 Taken together, our results suggest that control of symptoms, encouragement of  
38  
39 physical exercise and monitoring of psychological well-being reduce the burden of  
40  
41 allergic diseases, which affect half of the general paediatric population. Accordingly,  
42  
43 children diagnosed with allergic conditions will benefit from thorough monitoring of  
44  
45 their overall well-being. The focus in medical practice should thus not be limited to  
46  
47 medical treatment of symptoms but should also take account of also on children's  
48  
49 perceived impairments.<sup>24</sup> In fact, these may differ substantially from those of parents or  
50  
51 medical authorities.<sup>28</sup>

1  
2  
3 **Contributors:** L. Haanpää drafted the final version of this manuscript, and all authors  
4 (L. Haanpää, P. af Ursin, A. Kaljonen, M. Nermes, E. Isolauri) drafted different sections  
5 and paragraphs of this work, critically revised this work for important intellectual  
6 content, approved the final version to be published and agreed on the accuracy and  
7 integrity of this work. All authors had full access to all of the data (including statistical  
8 reports and tables) in the study and can take responsibility for the integrity of the data  
9 and the accuracy of the data analysis.  
10  
11  
12  
13  
14  
15  
16

17 **Funding:** This work was supported by the Juho Vainio Foundation .  
18  
19

20 **Competing interests:** All authors have completed the ICMJE uniform disclosure form  
21 at [www.icmje.org/coi\\_disclosure.pdf](http://www.icmje.org/coi_disclosure.pdf) and declare: no support from any organisation for  
22 the submitted work; no financial relationships with any organisations that might have an  
23 interest in the submitted work in the previous three years; no other relationships or  
24 activities that could appear to have influenced the submitted work.  
25  
26  
27  
28  
29

30 **Ethical approval:** This study was approved by the Ethics Committee of the University  
31 of Turku.  
32  
33  
34

35 **Data sharing:** No additional data available.  
36

37 **Transparency:** The lead author (LH) affirms that the manuscript is an honest, accurate,  
38 and transparent account of the study being reported; that no important aspects of the  
39 study have been omitted; and that any discrepancies from the study as planned have  
40 been explained.  
41  
42  
43  
44  
45  
46  
47  
48  
49  
50  
51  
52  
53  
54  
55  
56  
57  
58  
59  
60

**Table 1.** Socio-economic background variables, pet status, and allergy variables affecting children's life satisfaction analyzed by T-test for independent samples\*

|                                   | n    | SLSS       |    |           | p        | BMSLSS |            |    | p        |
|-----------------------------------|------|------------|----|-----------|----------|--------|------------|----|----------|
|                                   |      | Mean(sd)   | Md | Mean rank |          | n      | Mean(sd)   | Md |          |
| <b>Gender</b>                     |      |            |    |           | 0.7642   |        |            |    | 0.0685   |
| <b>boy</b>                        | 946  | 90.3(14.0) | 96 | 824.7     |          | 867    | 88.8(11.4) | 92 | 807.4    |
| <b>girl</b>                       | 998  | 89.8(14.8) | 96 | 818.9     |          | 938    | 89.3(12.1) | 92 | 848.5    |
| <b>Grade</b>                      |      |            |    |           | < 0.0001 |        |            |    | < 0.0001 |
| <b>4</b>                          | 942  | 91.0(14.4) | 96 | 864.4     |          | 863    | 90.7(11.4) | 94 | 924.9    |
| <b>6</b>                          | 1002 | 89.2(14.4) | 94 | 781.6     |          | 942    | 87.5(11.8) | 90 | 740.7    |
| <b>Ethnicity</b>                  |      |            |    |           | 0.6146   |        |            |    | 0.1949   |
| <b>no</b>                         | 1880 | 90.1(14.5) | 96 | 822.6     |          | 1743   | 89.1(11.7) | 92 | 831.5    |
| <b>yes</b>                        | 64   | 89.8(12.7) | 96 | 795.4     |          | 62     | 86.7(13.6) | 90 | 751.3    |
| <b>Parental employment status</b> |      |            |    |           | <0.0295  |        |            |    |          |
| <b>no</b>                         | 577  | 88.8(16.0) | 94 | 794.5     |          | 542    | 88.2(12.9) | 92 | 808.0    |
| <b>yes</b>                        | 1342 | 90.9(13.4) | 96 | 840.2     |          | 1241   | 89.6(10.9) | 92 | 845.3    |
| <b>Sports and exercise</b>        |      |            |    |           | <0.0020  |        |            |    | < 0.0001 |
| <b>no</b>                         | 78   | 83.1(21.4) | 94 | 678.2     |          | 65     | 79.8(16.4) | 82 | 511.4    |
| <b>yes</b>                        | 1803 | 90.4(14.0) | 96 |           |          | 1686   | 89.4(11.4) | 92 | 843.8    |
| <b>A pet when born</b>            |      |            |    |           | 0.1852   |        |            |    | 0.3060   |
| <b>no</b>                         | 962  | 90.4(13.3) | 96 | 841.4     |          | 894    | 89.6(11.1) | 92 | 849.6    |
| <b>yes</b>                        | 766  | 89.3(15.9) | 96 | 814.2     |          | 711    | 88.7(12.6) | 92 | 824.9    |
| <b>A pet now</b>                  |      |            |    |           | 0.3202   |        |            |    | < 0.0102 |
| <b>no</b>                         | 703  | 90.5(13.8) | 96 | 835.7     |          | 660    | 89.9(11.3) | 92 | 867.0    |
| <b>yes</b>                        | 1227 | 89.8(14.7) | 96 | 815.7     |          | 1132   | 88.5(12.0) | 92 | 806.7    |
| <b>Asthma</b>                     |      |            |    |           | 0.5263   |        |            |    | 0.8561   |
| <b>no</b>                         | 1678 | 90(14.2)   | 96 | 817.6     |          | 1566   | 89.0(11.6) | 92 | 827.2    |
| <b>yes</b>                        | 191  | 89.3(16.9) | 96 | 838.2     |          | 174    | 88.3(13.7) | 92 | 820.2    |
| <b>Eczema</b>                     |      |            |    |           | <0.0001  |        |            |    | < 0.0018 |
| <b>no</b>                         | 1446 | 90.8(13.7) | 96 | 843.3     |          | 1350   | 89.6(11.0) | 92 | 848.5    |
| <b>yes</b>                        | 452  | 87.5(16.6) | 92 | 745.8     |          | 414    | 87.2(13.4) | 90 | 764.6    |
| <b>Perennial rhinitis</b>         |      |            |    |           | 0.6494   |        |            |    | 0.6441   |
| <b>no</b>                         | 1140 | 89.9(14.6) | 96 | 816.0     |          | 1061   | 89.0(11.6) | 92 | 823.5    |
| <b>yes</b>                        | 764  | 90.0(14.3) | 96 | 825.1     |          | 709    | 89.1(11.9) | 92 | 834.2    |

\*By Kruskal-Wallis non-parametric tests.

**Table 2.** Children's life satisfaction explained by grade, parental employment status, physical activity, pet status, and allergy variables\*

|                                   | SLSS     |         |         | BMSLSS   |         |         |
|-----------------------------------|----------|---------|---------|----------|---------|---------|
|                                   | $\beta$  | t-value | p       | $\beta$  | t-value | p       |
| <b>Grade</b>                      | -60.880  | -4.41   | < 0.001 | -106.225 | -7.97   | < 0.001 |
| <b>Parental employment status</b> | 65.682   | 2.17    | < 0.05  | 70.065   | 2.40    | < 0.05  |
| <b>Sports and exercise</b>        | 194.053  | 2.87    | < 0.001 | 307.704  | 4.47    | < 0.001 |
| <b>A pet when born</b>            | -22.414  | 0.75    | 0.4511  | -7.676   | -0.27   | 0.7898  |
| <b>A pet now</b>                  | -28.816  | -0.94   | 0.3464  | -47.133  | -1.59   | 0.1113  |
| <b>Asthma</b>                     | 60.220   | 1.29    | 0.1959  | 1.662    | 0.04    | 0.9707  |
| <b>Eczema</b>                     | -128.220 | -3.94   | < 0.01  | -90.694  | -2.88   | < 0.01  |
| <b>Perennial rhinitis</b>         | 29.331   | 1.01    | 0.3122  | 19.440   | 0.70    | 0.4868  |

\*By linear regression analysis.

## REFERENCES

- <sup>1</sup> Mallol J, Crane J, von Mutius E, Odhiambo J, Keil U, Stewart A. The international study of asthma and allergies in childhood (ISAAC) phase three: a global synthesis. *Allergol Immunopathol (Madr)* 2013;41(2):73-85. doi: 10.1016/j.aller.2012.03.001.
- <sup>2</sup> Patterson AM, Yildiz VO, Klatt MD, Malarkey WB. *Perceived stress predicts allergy flares*. *Annals of Allergy, Asthma & Immunology: Official Publication of the American College of Allergy, Asthma, & Immunology* 2014;112(4):317-321. doi.org/10.1016/j.anai.2013.07.013.
- <sup>3</sup> Coffey, JK, Warren MT, Gottfried AV. Does infant happiness forecast adult life satisfaction? Examining subjective well-being in the first quarter century of life. *J Happiness Stud* 2015;16(6):1401-1421. Doi 10.1007/s10902-014-9556-x.
- <sup>4</sup> Sourander A, Helstelä L, Helenius H. Parent-adolescent agreement on emotional and behavioral problems. *Soc Psychiatry Psychiatr Epidemiol* 1999;34:657-663.
- <sup>5</sup> Diener E, Emmons RA, Larsen RJ, Griffin S. The satisfaction with life scale. *J Pers Assess* 1985;49:71-75.

<sup>6</sup> Huebner SE. Further validation of the students' life satisfaction scale: The independence of satisfaction and affect ratings. *J Psychoed Assess* 1991;9:363-368. Doi: 10.1177/073428299100900408.

<sup>7</sup> Seligson JL, Huebner ES, Valois RF. Preliminary validation of the brief multidimensional students' life satisfaction scale (BMSLSS). *Soc Ind Res* 2003;61:121-145. doi: 10.1007/s10488-011-0385-5.

<sup>8</sup> Children's worlds. 2017. <http://www.isciweb.org>.

<sup>9</sup> Lippman LH, Anderson Moore K, McIntosh H. *Positive indicators of child well-being: a conceptual framework, measures and methodological issues*. Innocenti Working Paper No. 2009-21; 2009. Florence, UNICEF Innocenti Research Centre.

<sup>10</sup> McDougall J, Wright W, Nichols M, Miller L. Assessing the psychometric properties of both a global and a domain-specific perceived quality of life measure when used with youth who have chronic conditions. *Soc Indic Res* 2013;114:1243-1257. Doi 10.1007/s11205-012-0200-z.

<sup>11</sup> Asher MI, Weiland SK on behalf of the ISAAC steering committee. The international study of asthma and allergies in childhood (ISAAC). *Clin Exp Allergy* 1998;28 Supp 5:52-66.

<sup>12</sup> Jousilahti P, Haahtela T, Laatikainen T, Mäkelä M, Vartiainen E. Asthma and respiratory allergy prevalence is still increasing among Finnish young adults. *Eur Respir J* 2016;47:985-987. Doi:10.1183/13993003.01702-2015.

<sup>13</sup> Asher MI, Montefort S, Björkstén B, Lai CK, Strachan DP, Weiland SK, et al. Worldwide time trends in the prevalence of symptoms of asthma, allergic rhinoconjunctivitis, and eczema in childhood: ISAAC Phases One and Three repeat multicountry cross-sectional surveys. *Lancet* 2006;368:733-43. Doi: 10.1016/S0140-6736(06)69283-0.



- 1  
2  
3  
4 <sup>14</sup> Masoli M, Fabian D, Holt S, Beasley R for the Global Initiative for Asthma (GINA)  
5  
6 Program. The global burden of asthma: executive summary of the GINA dissemination  
7  
8 committee report. *Allergy* 2004;59:469-478. Doi: 10.1111/j.1398-9995.2004.00526.x.  
9
- 10 <sup>15</sup> NCD Risk factor collaboration. Trends in adult body-mass index in 200 countries  
11  
12 from 1975 to 2014: a pooled analysis of 1698 population-based measurement studies  
13  
14 with 19.2 million participants. *Lancet* 2016;387:1377-96. Doi: 10.1016/S0140-  
15  
16 6736(16)30054-X.  
17
- 18 <sup>16</sup> Campbell DE, Boyle RJ, Thornton CA, Prescott SL. Mechanisms of allergic disease –  
19  
20 environmental and genetic determinants for the development of allergy. *Clin Exp*  
21  
22 *Allergy* 2015;45:844-858. Doi: 10.1111/cea.12531.  
23  
24
- 25 <sup>17</sup> Hersoug L-G, Linneberg A. The link between the epidemics of obesity and allergic  
26  
27 diseases: does obesity induce decreased immune tolerance? *Allergy* 2007;62:1205-13.  
28  
29 Doi: 10.1111/j.1398-9995.2007.01506.x.  
30  
31
- 32 <sup>18</sup> Rautava S, Luoto R, Salminen S, Isolauri E. Microbial contact during pregnancy,  
33  
34 intestinal colonization and human disease. *Nature Reviews Gastroenterology &*  
35  
36 *Hepatology* 2012; 9: 565-76. doi:10.1038/nrgastro.2012.144.  
37
- 38 <sup>19</sup> Baiardini I, Braido F, Giardini A, Majani G, Cacciola C, Rogaku A, Scordamaglia A,  
39  
40 Canonica GW. Adherence to treatment: assessment of an unmet need in asthma. *J*  
41  
42 *Investig Allergol Clin Immunol* 2006;16(4):218-23. Free full text.  
43  
44
- 45 <sup>20</sup> Teyhan A, Galobardes B, Henderson J. Child allergic symptoms and well-being at  
46  
47 school: Findings from ALSPAC, a UK cohort study. *J PLoS ONE*.  
48  
49 2015;10(8):e0135271. doi:10.1371/journal.pone.0135271.  
50
- 51 <sup>21</sup> Rutter M, Rutter M. *Developing minds. Challenge and continuity across the life span*.  
52  
53 England; Clays Ltd, 1993.  
54  
55  
56  
57  
58  
59  
60

- 1  
2  
3  
4 22 Silk JS, Siegle GJ, Lee KH, Nelson EE, Stroud LR, Dahl RE. Increased neural  
5  
6 response to peer rejection associated with adolescent depression and pubertal  
7  
8 development. *SCAN* 2014;9:1798-1807. Doi: doi.org/10.1093/scan/nst175.  
9
- 10 23 Juniper EF. How important is quality of life in pediatric asthma? *Pediatr Pulmonol*  
11  
12 *Suppl* 1997;15:17-21. Doi: 10.1002/(SICI)1099-0496(199709)15+<17::AID-  
13  
14 PPUL5>3.0.CO;2-O.  
15
- 16 24 Tuckman A. The Potential Psychological Impact of Skin Conditions. *Dermatol Ther*  
17  
18 (Heidelb)2017;7(Suppl 1):53-57. doi: 10.1007/s13555-016-0169-7.  
19  
20
- 21 25 Osman LR, Caldman C, Robertson R, et al. Symptoms, quality of life, and health  
22  
23 service contact among young adults with mild asthma. *Am J Respir Crit Care Med*  
24  
25 2000;61:498-503.  
26
- 27 26 Jago R, Searl A, Henderson AJ, Turner KM. Designing a physical activity  
28  
29 intervention for children with asthma: a qualitative study of the views of healthcare  
30  
31 professionals, parents and children with asthma. *BMJ Open* 2017;24:7(3):e014020.doi:  
32  
33 10.1136/bmjopen-2016-014020.  
34  
35
- 36 27 Cui W, Zack MM, HS Zahran. Health-related quality of life and asthma among  
37  
38 United States adolescents. *J Pediatr* 2015;166(2):358-364. Doi:  
39  
40 10.1016/j.jpeds.2014.10.005.  
41  
42
- 43 28 Akeson N, Worth A, Sheikh A. The psychosocial impact of anaphylaxis on young  
44  
45 people and their parents. *Clin Exp Allergy* 2007;37:1213-20. Doi: 10.1111/j.1365-  
46  
47 2222.2007.02758.x.  
48  
49  
50  
51  
52  
53  
54  
55  
56  
57  
58  
59  
60

## STROBE Statement—checklist of items that should be included in reports of observational studies

|                                | Item No | Recommendation                                                                                                                                                                                                                                                                                                                                                                                                                                                                                                                                                                                                                                                                                                         |
|--------------------------------|---------|------------------------------------------------------------------------------------------------------------------------------------------------------------------------------------------------------------------------------------------------------------------------------------------------------------------------------------------------------------------------------------------------------------------------------------------------------------------------------------------------------------------------------------------------------------------------------------------------------------------------------------------------------------------------------------------------------------------------|
| ✓ <b>Title and abstract</b>    | 1       | (a) Indicate the study's design with a commonly used term in the title or the abstract, p. 1<br><br>(b) Provide in the abstract an informative and balanced summary of what was done and what was found, p. 2                                                                                                                                                                                                                                                                                                                                                                                                                                                                                                          |
| <b>Introduction</b>            |         |                                                                                                                                                                                                                                                                                                                                                                                                                                                                                                                                                                                                                                                                                                                        |
| ✓ Background/rationale         | 2       | Explain the scientific background and rationale for the investigation being reported, p. 4                                                                                                                                                                                                                                                                                                                                                                                                                                                                                                                                                                                                                             |
| ✓ Objectives                   | 3       | State specific objectives, including any prespecified hypotheses, p. 4                                                                                                                                                                                                                                                                                                                                                                                                                                                                                                                                                                                                                                                 |
| <b>Methods</b>                 |         |                                                                                                                                                                                                                                                                                                                                                                                                                                                                                                                                                                                                                                                                                                                        |
| ✓ Study design                 | 4       | Present key elements of study design early in the paper, p. 5                                                                                                                                                                                                                                                                                                                                                                                                                                                                                                                                                                                                                                                          |
| ✓ Setting                      | 5       | Describe the setting, locations, and relevant dates, including periods of recruitment, exposure, follow-up, and data collection, p. 5                                                                                                                                                                                                                                                                                                                                                                                                                                                                                                                                                                                  |
| ✓ Participants                 | 6       | (a) <i>Cohort study</i> —Give the eligibility criteria, and the sources and methods of selection of participants. Describe methods of follow-up<br><br><i>Case-control study</i> —Give the eligibility criteria, and the sources and methods of case ascertainment and control selection. Give the rationale for the choice of cases and controls<br><br><i>Cross-sectional study</i> —Give the eligibility criteria, and the sources and methods of selection of participants, p. 5<br><br>(b) <i>Cohort study</i> —For matched studies, give matching criteria and number of exposed and unexposed<br><br><i>Case-control study</i> —For matched studies, give matching criteria and the number of controls per case |
| ✓ Variables                    | 7       | Clearly define all outcomes, exposures, predictors, potential confounders, and effect modifiers. Give diagnostic criteria, if applicable, p. 5-7                                                                                                                                                                                                                                                                                                                                                                                                                                                                                                                                                                       |
| ✓ Data sources/<br>measurement | 8*      | For each variable of interest, give sources of data and details of methods of assessment (measurement). Describe comparability of assessment methods if there is more than one group, p. 5-7                                                                                                                                                                                                                                                                                                                                                                                                                                                                                                                           |
| ✓ Bias                         | 9       | Describe any efforts to address potential sources of bias, p. 7                                                                                                                                                                                                                                                                                                                                                                                                                                                                                                                                                                                                                                                        |

|    |                          |    |                                                                          |
|----|--------------------------|----|--------------------------------------------------------------------------|
| 1  | ✓ Study size             | 10 | Explain how the study size was arrived at, p. 5                          |
| 2  |                          |    |                                                                          |
| 3  | ✓ Quantitative variables | 11 | Explain how quantitative variables were handled in the analyses.         |
| 4  |                          |    | If applicable, describe which groupings were chosen and why, p.          |
| 5  |                          |    | 7                                                                        |
| 6  |                          |    |                                                                          |
| 7  | ✓ Statistical methods    | 12 | (a) Describe all statistical methods, including those used to            |
| 8  |                          |    | control for confounding, p. 7                                            |
| 9  |                          |    |                                                                          |
| 10 |                          |    | (b) Describe any methods used to examine subgroups and                   |
| 11 |                          |    | interactions                                                             |
| 12 |                          |    |                                                                          |
| 13 |                          |    | (c) Explain how missing data were addressed                              |
| 14 |                          |    |                                                                          |
| 15 |                          |    | (d) <i>Cohort study</i> —If applicable, explain how loss to follow-up    |
| 16 |                          |    | was addressed                                                            |
| 17 |                          |    |                                                                          |
| 18 |                          |    | <i>Case-control study</i> —If applicable, explain how matching of cases  |
| 19 |                          |    | and controls was addressed                                               |
| 20 |                          |    |                                                                          |
| 21 |                          |    | <i>Cross-sectional study</i> —If applicable, describe analytical methods |
| 22 |                          |    | taking account of sampling strategy, p. 5                                |
| 23 |                          |    |                                                                          |
| 24 |                          |    | (e) Describe any sensitivity analyses                                    |

Continued on next page

**Results**

|   |                  |     |                                                                                                                                                                                                                    |
|---|------------------|-----|--------------------------------------------------------------------------------------------------------------------------------------------------------------------------------------------------------------------|
| ✓ | Participants     | 13* | (a) Report numbers of individuals at each stage of study—eg numbers potentially eligible, examined for eligibility, confirmed eligible, included in the study, completing follow-up, and analysed, p. 12           |
|   |                  |     | (b) Give reasons for non-participation at each stage                                                                                                                                                               |
|   |                  |     | (c) Consider use of a flow diagram                                                                                                                                                                                 |
| ✓ | Descriptive data | 14* | (a) Give characteristics of study participants (eg demographic, clinical, social) and information on exposures and potential confounders, p. 7-8, 12                                                               |
|   |                  |     | (b) Indicate number of participants with missing data for each variable of interest                                                                                                                                |
|   |                  |     | (c) <i>Cohort study</i> —Summarise follow-up time (eg, average and total amount)                                                                                                                                   |
| ✓ | Outcome data     | 15* | <i>Cohort study</i> —Report numbers of outcome events or summary measures over time                                                                                                                                |
|   |                  |     | <i>Case-control study</i> —Report numbers in each exposure category, or summary measures of exposure                                                                                                               |
|   |                  |     | <i>Cross-sectional study</i> —Report numbers of outcome events or summary measures, p. 5                                                                                                                           |
| ✓ | Main results     | 16  | (a) Give unadjusted estimates and, if applicable, confounder-adjusted estimates and their precision (eg, 95% confidence interval). Make clear which confounders were adjusted for and why they were included, p.12 |
|   |                  |     | (b) Report category boundaries when continuous variables were categorized                                                                                                                                          |
|   |                  |     | (c) If relevant, consider translating estimates of relative risk into absolute risk for a meaningful time period                                                                                                   |
| ✓ | Other analyses   | 17  | Report other analyses done—eg analyses of subgroups and interactions, and sensitivity analyses                                                                                                                     |

**Discussion**

|   |                  |    |                                                                                                                                                                                     |
|---|------------------|----|-------------------------------------------------------------------------------------------------------------------------------------------------------------------------------------|
| ✓ | Key results      | 18 | Summarise key results with reference to study objectives, p. 8-10                                                                                                                   |
| ✓ | Limitations      | 19 | Discuss limitations of the study, taking into account sources of potential bias or imprecision. Discuss both direction and magnitude of any potential bias, p. 10                   |
| ✓ | Interpretation   | 20 | Give a cautious overall interpretation of results considering objectives, limitations, multiplicity of analyses, results from similar studies, and other relevant evidence, p. 9-10 |
| ✓ | Generalisability | 21 | Discuss the generalisability (external validity) of the study results, p. 9                                                                                                         |

**Other information**

- 1  
2  
3  
4  
5  
6  
7  
8  
9  
10  
11  
12  
13  
14  
15  
16  
17  
18  
19  
20  
21  
22  
23  
24  
25  
26  
27  
28  
29  
30  
31  
32  
33  
34  
35  
36  
37  
38  
39  
40  
41  
42  
43  
44  
45  
46  
47  
48  
49  
50  
51  
52  
53  
54  
55  
56  
57  
58  
59  
60
- ✓ Funding 22 Give the source of funding and the role of the funders for the present study and, if applicable, for the original study on which the present article is based, p. 11

\*Give information separately for cases and controls in case-control studies and, if applicable, for exposed and unexposed groups in cohort and cross-sectional studies.

**Note:** An Explanation and Elaboration article discusses each checklist item and gives methodological background and published examples of transparent reporting. The STROBE checklist is best used in conjunction with this article (freely available on the Web sites of PLoS Medicine at <http://www.plosmedicine.org/>, Annals of Internal Medicine at <http://www.annals.org/>, and Epidemiology at <http://www.epidem.com/>). Information on the STROBE Initiative is available at [www.strobe-statement.org](http://www.strobe-statement.org).

# BMJ Open

## The association of allergic diseases with children's life satisfaction: population-based study in Finland

|                                 |                                                                                                                                                                                                                                                                                                                                                                                        |
|---------------------------------|----------------------------------------------------------------------------------------------------------------------------------------------------------------------------------------------------------------------------------------------------------------------------------------------------------------------------------------------------------------------------------------|
| Journal:                        | <i>BMJ Open</i>                                                                                                                                                                                                                                                                                                                                                                        |
| Manuscript ID                   | bmjopen-2017-019281.R1                                                                                                                                                                                                                                                                                                                                                                 |
| Article Type:                   | Research                                                                                                                                                                                                                                                                                                                                                                               |
| Date Submitted by the Author:   | 21-Dec-2017                                                                                                                                                                                                                                                                                                                                                                            |
| Complete List of Authors:       | Haanpää, Leena; Leena Haanpää; Leena Haanpää af Ursin, Piia; Turun yliopisto Kliininen laitos, Child and Youth Research Institute<br>Kaljonen, Anne; Turun Yliopisto, Department of Biostatistics<br>Nermes, Merja; Turun yliopisto Kliininen laitos, Department of Paediatrics<br>Isolauri, Erika; Turun yliopisto Kliininen laitos, Department of Pediatrics and Adolescent Medicine |
| <b>Primary Subject Heading</b>: | Dermatology                                                                                                                                                                                                                                                                                                                                                                            |
| Secondary Subject Heading:      | Dermatology                                                                                                                                                                                                                                                                                                                                                                            |
| Keywords:                       | Eczema < DERMATOLOGY, Paediatric dermatology < DERMATOLOGY, Paediatric dermatology < PAEDIATRICS                                                                                                                                                                                                                                                                                       |
|                                 |                                                                                                                                                                                                                                                                                                                                                                                        |

SCHOLARONE™  
Manuscripts

only

# The association of allergic diseases with children's life satisfaction: population-based study in Finland

Leena Haanpää, Piia af Ursin, Merja Nermes, Anne Kaljonen, Erika Isolauri

Child and Youth Research Institute, Institute of Clinical Medicine, University of Turku, FI-20014 Turku, Finland, Leena Haanpää senior researcher; Child and Youth Research Institute, University of Turku, FI-20014 Turku, Finland, Piia af Ursin senior researcher; Department of Paediatric and Adolescent Medicine, Turku University Hospital, Finland, FI-20521 Turku, Finland, Merja Nermes MD, PhD; Faculty of Medicine, Department of Biostatistics, University of Turku, 20014 FI-Turku, Finland, Anne Kaljonen bio-statistician; Department of Paediatrics, Institute of Clinical Medicine, University of Turku, 20014 FI-Turku, Finland, Department of Pediatrics and Adolescent Medicine, Turku University Hospital, FI-20521 Turku, Finland, Erika Isolauri Professor

**Correspondence to:** lehaan@utu.fi

The Corresponding Author has the right to grant on behalf of all authors and does grant on behalf of all authors, a worldwide licence to the Publishers and its licensees in perpetuity, in all forms, formats and media (whether known now or created in the future), to i) publish, reproduce, distribute, display and store the Contribution, ii) translate the Contribution into other languages, create adaptations, reprints, include within collections and create summaries, extracts and/or, abstracts of the Contribution, iii) create any other derivative work(s) based on the Contribution, iv) to exploit all subsidiary rights in the Contribution, v) the inclusion of electronic links from the Contribution to third party material wherever it may be located; and, vi) licence any third party to do any or all of the above.

**Number of words:** 4602



## Abstract

**Objective:** To assess the impact of allergic diseases on the subjective well-being and life satisfaction of primary school children.

**Design:** Population-based cohort.

**Setting:** Finnish sample of children ages 10 and 12 from the International Survey of Children's Well-Being.

**Participants:** Nationally representative sample of 1947 school children.

**Main outcome measure:** Two different instruments to assess the child's own perception of well-being; the short version of the Student Life Satisfaction Scale (SLSS) and the Brief Multidimensional Student Life Satisfaction Scale (BMSLSS).

**Results:** Altogether, 51.4% of children reported having at least one allergic condition (10.1% asthma, 23.8% eczema, and 40.3% seasonal allergic rhinitis). A statistically significant distinction in life satisfaction emerged between non-allergic and allergic children (inferior in the latter). In particular, children with eczema were more likely to report a reduction in life satisfaction compared to non-allergic children (SLSS  $\beta = -128.220$ ; BMSLSS  $\beta = -90.694$ ;  $p < 0.01$ ). Apart from freedom from eczema, good life satisfaction was associated with a physically active life style.

**Conclusions:** Active allergic disease reduces the child's own perception of well-being. During clinical visits, more attention should be paid to the child's psychosocial status and impairments, which may differ substantially from those of parents or medical authorities.

**Keywords:** allergy; asthma; eczema; life satisfaction, physical activity

### Strengths and limitations of this study

- The first nationally representative survey on subjective life satisfaction in primary-school children in Finland.
- The first national study that observed allergic diseases with relation to children's life satisfaction.
- The study did not directly and objectively assess the allergy symptoms in question. The research focus was on children's own perception of life-satisfaction rather than on disease severity.
- The data used in the present study are cross-sectional, and any causal relationship between the predictors and outcome variables thus remains obscure.

## INTRODUCTION

Societies worldwide are faced with a progressively increasing risk of immune-mediated health problems such as allergic, autoimmune, and inflammatory diseases, and the velocity of propagation is highest in children.<sup>1 2</sup> Allergic diseases, the first manifestation of these conditions, comprise the most common chronic disease among children, with a prevalence ranging from 7% (eczema) to 14.6% (asthma and rhinitis) in 13- to 14-year-old children.<sup>3</sup> Thus, allergic diseases represent a significant burden not only for society and the family but also for the affected individual.

The severity of allergic disease is assessed by the extent of symptoms in daily life. A vicious circle of symptoms of allergic disease such as allergy flares and emotional stress has been documented, and these symptoms can potentially contribute to the experienced burden of the disease.<sup>4</sup> Despite a growing interest in life satisfaction during childhood, little is known about how chronic diseases such as asthma or eczema affect children's subjective well-being (SWB), that is, psychosocial contentment. In fact, the burden of allergic disorders may extend well beyond mere physical functioning.

Youth with a chronic illness are at increased risk for poor self-concept<sup>5</sup> and show significantly higher rates of emotional and behavioural problems.<sup>6</sup> Self-concept, as a fundamental part of a child's psychological function, is strongly affected by parental and peer approval, physical appearance and perceived competence in domains of importance, such as athletics.<sup>7</sup> For example, for children with asthma, a decreased quality of life has been found to be related to limited activities and participation in sports.<sup>8</sup>

The importance of the disease burden may culminate in children, whose recognition of self and self-esteem are still evolving, and thus disease may have a long-term impact on personal well-being and quality of life.<sup>6 9 10 11</sup> In the medical literature,

1  
2  
3 quality of life refers to a 'uniquely personal perception, denoting the way that individual  
4 patients feel about their health status and/or nonmedical aspects of their lives'.<sup>12</sup> On one  
5 hand, health is considered a major component affecting one's quality of life and on the  
6 other hand, good quality of life is an important outcome of successful treatment of  
7 diseases.<sup>8</sup>

8  
9  
10  
11  
12  
13 The objective of the study presented here was to assess the impact of allergic  
14 diseases on subjective well-being and life satisfaction among primary-school children.  
15 Conventionally, children's well-being has been determined indirectly, using proxies  
16 such as household income, mortality, or life expectancy or using parental reports on  
17 child well-being,<sup>13 14</sup> thus ignoring the child's own point of view. However, children's  
18 and parents' perceptions of a child's quality of life often differ; thus, obtaining  
19 information directly from the child is advisable.<sup>9 12</sup> Another gap in the research literature  
20 regards the lack of attention to ethnically and racially diverse samples.<sup>10 15 16</sup> Research  
21 on racially diverse groups of children with allergic diseases would increase our  
22 knowledge of the association between allergy and childhood quality of life in  
23 populations of children who may already be at increased risk of impaired well-being.<sup>10</sup>

24  
25  
26  
27  
28  
29  
30  
31  
32  
33  
34  
35  
36  
37  
38  
39  
40  
41  
42  
43  
44  
45  
46  
47  
48  
49  
50  
51  
52  
53  
54  
55  
56  
57  
58  
59  
60  
Recent research has provided tools that can be used to evaluate self-reported  
perceptions of quality of life, satisfaction, or other emotional and behavioural elements  
of children's lives.<sup>17</sup> In the context of allergic diseases, we applied for the first time two  
summary measures of life satisfaction: the Student Life Satisfaction Scale (SLSS,  
measuring children's overall life satisfaction) and the Brief Multidimensional Student  
Life Satisfaction Scale (BMSLSS, measuring children's overall life satisfaction).<sup>17 18 19</sup>

## METHODS

## Study population and setting

This study is part of an international Children's Worlds survey (<http://www.isciweb.org>),<sup>20</sup> which is an international survey on school-aged children's subjective well-being. The purpose of the study is to improve children's well-being by creating awareness among children, their parents, and their communities, as well as among other parties involved in children's lives, such as policy decision makers or teachers. The study was approved by the Ethics Committee of the University of Turku (statement obtained 15 February 2016). Cross-sectional data collected in Finland were used, comprising a random selection of nationally representative data from 43 primary schools (35 classes of 4<sup>th</sup> graders, 39 classes of 6<sup>th</sup> graders). Informed consent was obtained from the participants and their parents prior to administering the survey. Finally, in each school at least 40 pupils in each of grades 4 and 6 were recruited. In total, 1947 pupils (67.6% response rate; 48.7% boys; mean age, 11 years) completed an online anonymous questionnaire.

## Outcome variables

### Global life satisfaction

A reduced version of Huebner's<sup>17</sup> SLSS was expanded by one item assessing children's overall life satisfaction ('the things in my life are excellent'), adapted from Diener.<sup>18</sup> The SLSS hypothesizes that children are able to formulate judgments of their overall life satisfaction over and above judgments concerning specific domains (e.g., family, friends, community).<sup>17</sup> Instead of asking about dissatisfaction and negative life judgments, the SLSS focuses on positive, affective conceptualizations of the child's life. This provides information that is complementary to children's own perceptions of their

1  
2  
3 optimal development. The internal consistency of the SLSS items was tested via  
4  
5 Cronbach's alpha, resulting in  $\alpha = 0.94$ , indicating internal consistency and reliability.  
6  
7  
8  
9

### 10 11 Domain-specific life satisfaction

12  
13 The BMSLSS<sup>19</sup> measures satisfaction in life in more general terms than the SLSS. The  
14  
15 evaluation covers five important life domains, using one item per domain: family life,  
16  
17 friendships, school experience, body image, and child's living environment ( $\alpha = 0.78$ ).  
18  
19

### 20 Scoring and validity

21  
22 In both scales, the scoring system was modified from the original version (1 = 'Strongly  
23  
24 disagree' to 6 = 'Strongly agree') to an 11-point scale (0–10). A higher score reflects  
25  
26 higher life satisfaction. After calculating the mean of all five items, the subscales were  
27  
28 summed and transformed into a scale of 0–100.  
29  
30

31 SLSS and BMSLSS are validated measures of children's experiences of life  
32  
33 satisfaction including psychometric properties, targeted to age groups from 8 to 18  
34  
35 years. These measures have been successfully used in other experience sampling  
36  
37 studies; however, to date only a few studies have used them in the context of chronic  
38  
39 conditions.<sup>21 22</sup>  
40  
41  
42  
43

### 44 **Characterization of the allergic conditions**

45  
46 Three questions, modified from the ISAAC Phase One core questionnaires investigating  
47  
48 the prevalence of doctor-diagnosed asthma, allergic rhinitis, and eczema in children  
49  
50 worldwide,<sup>23</sup> were used to characterize allergic disease among the study population. In  
51  
52 Finland, the ISAAC core questions on asthma have been validated against anti-  
53  
54 asthmatic medication reimbursement data from the Finnish Social Insurance Institution  
55  
56  
57  
58  
59  
60

1  
2  
3 and were found to be highly valid.<sup>24</sup> The participants were asked whether they used  
4 inhaled asthma medication (no/yes) prescribed by a doctor. In like manner, children  
5 were asked about the presence of itchy rash sometimes appearing and disappearing  
6 (no/yes), which was interpreted to represent atopic eczema. Although ISAAC questions  
7 on eczema have not been specifically validated in the Finnish language, it has been  
8 shown that, in general, ISAAC-questionnaire-derived symptom prevalence is  
9 sufficiently precise at the population level.<sup>25</sup> Runny or blocked nose and sneezing in  
10 seasons of birch pollen or hay (no/yes) was considered to represent seasonal allergic  
11 rhinitis in Finland.  
12  
13  
14  
15  
16  
17  
18  
19  
20  
21  
22  
23

#### 24 **Data on background variables**

25  
26 Self-reported sex, age, ethnic background and parent's employment status were used as  
27 socio-demographic background variables. Children were asked for the employment  
28 status of both parents (mother and father working: yes, no, do not know) and a recoded  
29 variable was formed (parents working: no, yes). Ethnic background was determined  
30 based on three items: were you / your mother / your father born in Finland (yes, no, I  
31 am not sure). Additionally, we used data on pets (a pet in the family when the child was  
32 born or currently in the household; yes, no, I do not know). After-school physical  
33 activity (sports or exercising) was self-reported.  
34  
35  
36  
37  
38  
39  
40  
41  
42  
43  
44  
45

#### 46 **Statistical analysis**

47  
48 Continuous non-normally distributed SLSS and BMSLSS outcome variables were  
49 characterized using means, standard deviations, medians and mean ranks. Ranks,  
50 counted over the total data, were used in analyses because of the extremely left skewed  
51 distributions of the outcome variables SLSS and BMSLSS. Student's *t*-test for  
52  
53  
54  
55  
56  
57  
58  
59  
60

1  
2  
3 independent samples was applied in comparisons between variables. In the second  
4  
5 phase of analysis, the significant background variables from both SLSS and BMSLSS  
6  
7 and all five asthma variables (A pet when born, A pet now, Asthma, Eczema, Perennial  
8  
9 rhinitis) were subjected to linear regression analysis. The interactions were evaluated,  
10  
11 but all were excluded as non-significant from the final regression models. Imputation of  
12  
13 the data was not applied to statistical analysis. However, the analyses were conducted  
14  
15 using weighting coefficients calculated for Finnish data.<sup>20</sup> This takes into account non-  
16  
17 response, varying probabilities of selection, and variations between characteristics of  
18  
19 the sample and the population from which the sample was drawn. Statistical analyses  
20  
21 were carried out using SAS for Windows version 9.4 (SAS, Cary, NC, USA) and *p*-  
22  
23 values below 0.05 were considered statistically significant.  
24  
25  
26  
27

## 28 29 **RESULTS**

30  
31 Overall, the Finnish children in this study evaluated their well-being as excellent; more  
32  
33 than 80% of 10- and 12-years-olds were very satisfied with their lives. Altogether,  
34  
35 51.4% (*n* = 965) reported having at least one allergic disease – 10.1% (*n* = 188) doctor-  
36  
37 diagnosed asthma, 23.8% (*n* = 452) eczema, and 40.3% (*n* = 769) seasonal allergic  
38  
39 rhinitis.  
40

41  
42 A significant difference in life satisfaction emerged between non-allergic and  
43  
44 allergic children on both scales (Table 1). In particular, eczema was associated with  
45  
46 reduced well-being when compared with children not manifesting atopic eczema: the  
47  
48 difference on both scales was statistically significant (SLSS, *p* < 0.001; BMSLSS, *p* <  
49  
50 0.01). In contrast, no associations were detected between asthma or allergic rhinitis and  
51  
52 life satisfaction. It is of note that all subjects with an asthma diagnosis were on  
53  
54 prescribed inhaled asthma medication. An additional correlation analysis showed that  
55  
56  
57  
58  
59  
60



1  
2  
3 all the domains of BMSLSS were statistically significantly associated with eczema. The  
4  
5 most affected domain was body image ( $r = -0.10, p < 0.001$ ).  
6

7 The determinants of good life satisfaction were measured by a multivariable  
8  
9 model (Table 2). Children not having eczema, aged 10 years (grade 4), with working  
10  
11 parents and a physically active life style were found to be more satisfied with their lives  
12  
13 than other children. Having had pets in early infancy or having pets currently had no  
14  
15 impact on life satisfaction.  
16

17  
18 Taken together, the strongest predictor of good life satisfaction was a physically  
19  
20 active life style ( $\beta = 194.05, p < .001$ ), while reduced life satisfaction was correlated  
21  
22 with eczema ( $\beta = -128.22, p < 0.001$ ).  
23  
24  
25

## 26 **DISCUSSION**

27  
28  
29  
30  
31 This study, which is the first nationally representative survey on subjective life  
32  
33 satisfaction and allergic diseases in primary-school children, revealed that active  
34  
35 allergic disease is a major determinant of children's well-being in various domains. In  
36  
37 particular, eczema was seen to reduce both global life satisfaction related to children's  
38  
39 moods and feelings (SLSS) and life satisfaction as measured across broader domains of  
40  
41 living (BMSLSS). In accord with national<sup>26</sup> and international<sup>27</sup> reports, half of the  
42  
43 children in the studied sample reported having at least one allergic condition, indicating  
44  
45 that our results may be generalizable.  
46

47  
48 Not only do allergic diseases comprise the most common chronic disorder of  
49  
50 childhood;<sup>28</sup> they also represent the first manifestation of the growing epidemic of non-  
51  
52 communicable diseases,<sup>29</sup> which tend to share environmental risk factors and patho-  
53  
54 mechanisms and frequently coexist.<sup>2,30,31</sup> Besides their well-known economic burden,  
55  
56  
57  
58  
59  
60

1  
2  
3 chronic diseases exert a substantial psychosocial impact on children and their families.  
4  
5 This notwithstanding, health-related quality of life research has only recently attracted  
6  
7 scientific interest.<sup>22 32 33</sup>  
8

9 The importance of life satisfaction may be highest in childhood. Children,  
10 specifically those on the very edge of puberty, are vulnerable to external influences such  
11 as peer acceptance.<sup>34</sup> This phase of life is especially important with regards to self-  
12 acceptance and relation to self. As also demonstrated in this study, younger children  
13 were more content in terms of their life satisfaction than older ones. Hence, our study  
14 results tend to substantiate those of previous research<sup>5</sup> according to which age is related  
15 to perceptions of well-being, for example in the context of emotional well-being.  
16 However, the lack of interaction between the variables of age, allergies, and life  
17 satisfaction indicates that the experience of life satisfaction is influenced by the burdens  
18 presented by allergies and age individually.  
19  
20  
21  
22  
23  
24  
25  
26  
27  
28  
29

30  
31 Previous studies mainly on adult populations indicate that active allergic diseases  
32 are related to decreased well-being, as manifested in fewer relationships, limited daily  
33 functioning and decreased self-acceptance, as well as decreased emotional well-being.<sup>32</sup>  
34  
35  
36  
37  
38  
39  
40  
41  
42  
43  
44  
45  
46  
47  
48  
49  
33 35 36 Our results further underline that allergic diseases not only affect separate  
domains of children's lives but also have a holistic effect; the intricacy of the allergic  
burden is manifested in children's overall life satisfaction. For example, skin conditions  
distress psychosocial well-being by virtue of the stigma resulting from the visibility of  
dermatological symptoms.<sup>33</sup> Furthermore, children with persistent or late-onset eczema  
or with persistent wheeze were demonstrated to have psychosocial problems at school.<sup>33</sup>

50 Our study results show no association between ethnic background, allergic  
51 diseases, and life satisfaction. This suggests that the impact of allergic diseases does not  
52 differ between ethnically Finnish children and children with an immigrant background.  
53  
54  
55  
56  
57  
58  
59  
60

1  
2  
3 Parental employment status was significantly related to life satisfaction, indicating that  
4 children of working parents were more satisfied with their lives than those of non-  
5 working parents. This association, however, was not associated with allergic diseases.  
6  
7

8  
9 In the present study, respiratory allergy seemed to have less influence on  
10 children's life-satisfaction than eczema. An alternative explanation would be that the  
11 absence of effects indicates that the symptoms of these allergies are treatable.  
12  
13 Interestingly, previous studies suggest that symptom-free patients report better well-  
14 being than the population on average,<sup>37</sup> suggesting that it is not the chronic disease *per*  
15 *se* which impacts the quality of life of those affected but the manifestations thereof  
16 (symptoms). Treating asthma promotes a physically active life style,<sup>38</sup> and a physically  
17 active life style was strongly associated with life satisfaction in the present survey.  
18  
19 Thus, the benefit of balanced asthma treatment may extend far beyond physical health  
20 to psychosocial consequences and overall improvements in the quality of life.<sup>39</sup>  
21  
22  
23  
24  
25  
26  
27  
28  
29

30  
31 Several limitations of this study need to be acknowledged. Firstly, the study did  
32 not directly and objectively assess the symptoms in question. Rather, the research  
33 focused on children's own perception of disease severity. Similarly, there is a potential  
34 for error in children's reports of parental employment status and pet ownership at  
35 child's birth. Using objective measures or medical records to verify diagnoses and  
36 disease severity and, for instance, parental reports to verify employment status is one  
37 way for future studies to improve upon the current study assessing self-reported  
38 diseases as correlates of children's life satisfaction. Lastly, the data used in the present  
39 study are cross-sectional, and any causal relationship between the predictors and  
40 outcome variables thus remains obscure.  
41  
42  
43  
44  
45  
46  
47  
48  
49  
50  
51

52 Taken together, our results suggest a call to monitor the psychological well-being  
53 of children affected by allergic diseases, which are the most common chronic diseases  
54  
55  
56  
57  
58  
59  
60

1  
2  
3 in childhood. In medical care, consideration should be given to the children's perceived  
4 impairments,<sup>37</sup> as these may differ substantially from the perceptions of parents or  
5 medical authorities.<sup>40</sup>  
6  
7  
8  
9

10  
11 **Contributors:** L. Haanpää drafted the final version of this manuscript, and all authors  
12 (L. Haanpää, P. af Ursin, A. Kaljonen, M. Nermes, E. Isolauri) drafted different sections  
13 and paragraphs of this work, critically revised this work for important intellectual  
14 content, approved the final version to be published, and agreed on the accuracy and  
15 integrity of this work. All authors had full access to all of the data (including statistical  
16 reports and tables) in the study and can take responsibility for the integrity of the data  
17 and the accuracy of the data analysis.  
18  
19

20  
21 **Funding:** This work was supported by the Juho Vainio Foundation.  
22  
23

24  
25 **Competing interests:** All authors have completed the ICMJE uniform disclosure form  
26 at [www.icmje.org/coi\\_disclosure.pdf](http://www.icmje.org/coi_disclosure.pdf) and declare the following: no support from any  
27 organisation for the submitted work; no financial relationships with any organisations  
28 that might have an interest in the submitted work in the previous three years; no other  
29 relationships or activities that could appear to have influenced the submitted work.  
30  
31

32  
33 **Ethical approval:** This study was approved by the Ethics Committee of the University  
34 of Turku.  
35  
36

37  
38 **Data sharing:** No additional data available.  
39  
40

41  
42 **Transparency:** The lead author (LH) affirms that the manuscript is an honest, accurate,  
43 and transparent account of the study being reported; that no important aspects of the  
44 study have been omitted; and that any discrepancies from the study as planned have  
45 been explained.  
46  
47  
48  
49  
50  
51  
52  
53  
54  
55  
56  
57  
58  
59  
60

**Table 1.** Socio-economic background variables, pet status, and allergy variables affecting children's life satisfaction analysed by t-test for independent samples.\*

|                          | <i>n</i> | SLSS       |    |           | <i>p</i> | <i>n</i> | BMSLSS     |    |           | <i>p</i> |
|--------------------------|----------|------------|----|-----------|----------|----------|------------|----|-----------|----------|
|                          |          | Mean(sd)   | Md | Mean rank |          |          | Mean(sd)   | Md | Mean rank |          |
| <b>Gender</b>            |          |            |    |           | 0.7642   |          |            |    |           | 0.0685   |
| <b>boy</b>               | 946      | 90.3(14.0) | 96 | 824.7     |          | 867      | 88.8(11.4) | 92 | 807.4     |          |
| <b>girl</b>              | 998      | 89.8(14.8) | 96 | 818.9     |          | 938      | 89.3(12.1) | 92 | 848.5     |          |
| <b>Grade</b>             |          |            |    |           | <0.0001  |          |            |    |           | <0.0001  |
| <b>4</b>                 | 942      | 91.0(14.4) | 96 | 864.4     |          | 863      | 90.7(11.4) | 94 | 924.9     |          |
| <b>6</b>                 | 1002     | 89.2(14.4) | 94 | 781.6     |          | 942      | 87.5(11.8) | 90 | 740.7     |          |
| <b>Born in Finland</b>   |          |            |    |           | 0.6146   |          |            |    |           | 0.1949   |
| <b>no</b>                | 1880     | 90.1(14.5) | 96 | 822.6     |          | 1743     | 89.1(11.7) | 92 | 831.5     |          |
| <b>yes</b>               | 64       | 89.8(12.7) | 96 | 795.4     |          | 62       | 86.7(13.6) | 90 | 751.3     |          |
| <b>Parents working</b>   |          |            |    |           | <0.0295  |          |            |    |           |          |
| <b>no</b>                | 577      | 88.8(16.0) | 94 | 794.5     |          | 542      | 88.2(12.9) | 92 | 808.0     | 0.1292   |
| <b>yes</b>               | 1342     | 90.9(13.4) | 96 | 840.2     |          | 1241     | 89.6(10.9) | 92 | 845.3     |          |
| <b>Doing sports</b>      |          |            |    |           | <0.0020  |          |            |    |           | <0.0001  |
| <b>no</b>                | 78       | 83.1(21.4) | 94 | 678.2     |          | 65       | 79.8(16.4) | 82 | 511.4     |          |
| <b>yes</b>               | 1803     | 90.4(14.0) | 96 |           |          | 1686     | 89.4(11.4) | 92 | 843.8     |          |
| <b>A pet when born</b>   |          |            |    |           | 0.1852   |          |            |    |           | 0.3060   |
| <b>no</b>                | 962      | 90.4(13.3) | 96 | 841.4     |          | 894      | 89.6(11.1) | 92 | 849.6     |          |
| <b>yes</b>               | 766      | 89.3(15.9) | 96 | 814.2     |          | 711      | 88.7(12.6) | 92 | 824.9     |          |
| <b>A pet now</b>         |          |            |    |           | 0.3202   |          |            |    |           | =0.0102  |
| <b>no</b>                | 703      | 90.5(13.8) | 96 | 835.7     |          | 660      | 89.9(11.3) | 92 | 867.0     |          |
| <b>yes</b>               | 1227     | 89.8(14.7) | 96 | 815.7     |          | 1132     | 88.5(12.0) | 92 | 806.7     |          |
| <b>Asthma</b>            |          |            |    |           | 0.5263   |          |            |    |           | 0.8561   |
| <b>no</b>                | 1678     | 90(14.2)   | 96 | 817.6     |          | 1566     | 89.0(11.6) | 92 | 827.2     |          |
| <b>yes</b>               | 191      | 89.3(16.9) | 96 | 838.2     |          | 174      | 88.3(13.7) | 92 | 820.2     |          |
| <b>Eczema</b>            |          |            |    |           | <0.0001  |          |            |    |           | =0.0018  |
| <b>no</b>                | 1446     | 90.8(13.7) | 96 | 843.3     |          | 1350     | 89.6(11.0) | 92 | 848.5     |          |
| <b>yes</b>               | 452      | 87.5(16.6) | 92 | 745.8     |          | 414      | 87.2(13.4) | 90 | 764.6     |          |
| <b>Seasonal rhinitis</b> |          |            |    |           | 0.6494   |          |            |    |           | 0.6441   |
| <b>no</b>                | 1140     | 89.9(14.6) | 96 | 816.0     |          | 1061     | 89.0(11.6) | 92 | 823.5     |          |
| <b>yes</b>               | 764      | 90.0(14.3) | 96 | 825.1     |          | 709      | 89.1(11.9) | 92 | 834.2     |          |

\*By Kruskal-Wallis non-parametric tests.

**Table 2.** Children's life satisfaction explained by grade, parental employment status, physical activity, pet status, and allergy variables.\*

|                          | SLSS     |        |          | BMSLSS   |        |          |
|--------------------------|----------|--------|----------|----------|--------|----------|
|                          | $\beta$  | SE     | <i>p</i> | $\beta$  | SE     | <i>p</i> |
| <b>Grade</b>             | -60.880  | 13.799 | <0.001   | -106.225 | 13.322 | <0.001   |
| <b>Parents working</b>   | 65.682   | 30.324 | <0.05    | 70.065   | 29.141 | <0.05    |
| <b>Doing sports</b>      | 194.053  | 67.723 | <0.001   | 307.704  | 68.914 | <0.001   |
| <b>A pet when born</b>   | -22.414  | 29.734 | 0.4511   | -7.676   | 28.794 | 0.7898   |
| <b>A pet now</b>         | -28.816  | 30.597 | 0.3464   | -47.133  | 29.577 | 0.1113   |
| <b>Asthma</b>            | 60.220   | 46.539 | 0.1959   | 1.662    | 45.248 | 0.9707   |
| <b>Eczema</b>            | -128.220 | 32.575 | <0.01    | -90.694  | 31.441 | <0.01    |
| <b>Seasonal rhinitis</b> | 29.331   | 29.015 | 0.3122   | 19.440   | 27.947 | 0.4868   |

\*By linear regression analysis.

## REFERENCES

- <sup>1</sup> Bach JF. The effect of infections on susceptibility to autoimmune and allergic diseases. *N Engl J Med*. 2002;347;12:911-920. Doi: 10.1056/NEJMra020100.
- <sup>2</sup> Rautava S, Luoto R, Salminen S, Isolauri E. Microbial contact during pregnancy, intestinal colonization and human disease. *Nat. Rev. Gastroenterol. Hepatol*. 2012;9:565-576. doi: 10.1038/nrgastro.2012.144.
- <sup>3</sup> Mallol J, Crane J, von Mutius E, Odhiambo J, Keil U, Stewart A. The international study of asthma and allergies in childhood (ISAAC) phase three: a global synthesis. *Allergol Immunopathol (Madr)* 2013;41(2):73-85. doi: 10.1016/j.aller.2012.03.001.
- <sup>4</sup> Patterson AM, Yildiz VO, Klatt MD, Malarkey WB. *Perceived stress predicts allergy flares*. *Annals of Allergy, Asthma & Immunology: Official Publication of the American College of Allergy, Asthma, & Immunology* 2014;112(4):317-321. doi.org/10.1016/j.anai.2013.07.013.
- <sup>5</sup> Ferro M, Boyle M. Self-concept among youth with a chronic illness: A meta-analytic review. *Health Psychol* 2013;32;8: 839-848. Doi: 10.1037/a0031861.
- <sup>6</sup> Ferro MA, Van Lieshout RJ, Ohayon J, Scott JG. Emotional and behavioral problems in adolescents and young adults with food allergy. *Allergy* 2016;71:532-540. Doi: 10.1111/all.12829.
- <sup>7</sup> Harter S. *The Construction of the Self: A Developmental Perspective*. New York, NY, USA; Guilford, 1999.
- <sup>8</sup> Glazebrook C, McPherson AC, Macdonald IA, Swift JA, Ramsay C, Newbould R, Smyth A. Asthma as a barrier to children's physical activity: implications for body mass index and mental health. *Pediatrics* 2006;118;6:2443-2449. Doi: 10.1542/peds.2006-1846.

- 1  
2  
3  
4<sup>9</sup> Merikallio VJ, Mustalahti K, Remes ST, Valovirta EJ, Kaila M. Comparison of quality  
5  
6 of life between asthmatic and healthy school children. *Pediatr Allergy Immunol*  
7  
8 2005;16:332-340. Doi: 10.1111/j.1399-3038.2005.00286.x  
9
- 10<sup>10</sup> Everhart RS, Fiese BH. Asthma severity and child quality of life in pediatric asthma:  
11  
12 A systematic review. *Patient Educ Couns* 2009;75:162-168. Doi:  
13  
14 10.1016/j.pec.2008.10.001.  
15
- 16<sup>11</sup> Heintz D, Chalmers J, Nankervis H, Apfelbacher CJ. Eczema Trials: Quality of Life  
17  
18 Instruments Used and Their Relation to Patient-Reported Outcomes. A Systematic  
19  
20 Review. *Acta Derm Venereol* 2016;96:596-601. Doi: 10.2340/00015555-2322.  
21  
22
- 23<sup>12</sup> Gill TM, Feinstein AR. A critical appraisal of the quality of quality-of-life  
24  
25 measurements. *JAMA* 1994;272;8:619-626. Doi:10.1001/jama.1994.03520080061045.  
26  
27
- 28<sup>13</sup> Coffey, JK, Warren MT, Gottfried AV. Does infant happiness forecast adult life  
29  
30 satisfaction? Examining subjective well-being in the first quarter century of life. *J*  
31  
32 *Happiness Stud* 2015;16(6):1401-1421. doi 10.1007/s10902-014-9556-x.  
33
- 34<sup>14</sup> Sourander A, Helstelä L, Helenius H. Parent-adolescent agreement on emotional and  
35  
36 behavioral problems. *Soc Psychiatry Psychiatr Epidemiol* 1999;34:657-663.  
37
- 38<sup>15</sup> McQuaid EL, Farrow ML, Esteban CA, Jandasek BN, Rudders SA. Topical Review:  
39  
40 Pediatric Food Allergies among Diverse Children. *J Pediatr Psychol* 2016;41;4:391-  
41  
42 396. Doi: 10.1093/jpepsy/jsv051.  
43  
44
- 45<sup>16</sup> Shaw TE, Currie, GP, Koudelka CW, Simpson EL. Eczema prevalence in the United  
46  
47 States: Data from the 2003 national survey of children's health. *J Invest Dermatol*  
48  
49 2011;131;1:67-73. Doi: 10.1038/jid.2010.251.  
50
- 51<sup>17</sup> Diener E, Emmons RA, Larsen RJ, Griffin S. The satisfaction with life scale. *J Pers*  
52  
53 *Assess* 1985;49:71-75.  
54  
55  
56  
57  
58  
59  
60



1  
2  
3  
4 <sup>18</sup> Huebner SE. Further validation of the students' life satisfaction scale: The  
5 independence of satisfaction and affect ratings. *J Psychoed Assess* 1991;9:363-368. Doi:  
6 10.1177/073428299100900408.  
7  
8

9  
10 <sup>19</sup> Seligson JL, Huebner ES, Valois RF. Preliminary validation of the brief  
11 multidimensional students' life satisfaction scale (BMSLSS). *Soc Ind Res* 2003;61:121-  
12 145. doi: 10.1007/s10488-011-0385-5.  
13  
14

15  
16 <sup>20</sup> Children's worlds. 2017. <http://www.isciweb.org>.  
17

18  
19 <sup>21</sup> Lippman LH, Anderson Moore K, McIntosh H. *Positive indicators of child well-*  
20 *being: a conceptual framework, measures and methodological issues*. Innocenti  
21 Working Paper No. 2009-21; 2009. Florence, UNICEF Innocenti Research Centre.  
22  
23

24  
25 <sup>22</sup> McDougall J, Wright W, Nichols M, Miller L. Assessing the psychometric properties  
26 of both a global and a domain-specific perceived quality of life measure when used with  
27 youth who have chronic conditions. *Soc Indic Res* 2013;114:1243-1257. Doi  
28 10.1007/s11205-012-0200-z.  
29  
30  
31

32  
33  
34 <sup>23</sup> Asher MI, Weiland SK on behalf of the ISAAC steering committee. The international  
35 study of asthma and allergies in childhood (ISAAC). *Clin Exp Allergy* 1998;28 Supp  
36 5:52-66.  
37  
38

39  
40  
41 <sup>24</sup> Nwaru BI, Lumia M, Kaila M, Luukkainen P, Tapanainen H, Erkkola M. Validation  
42 of the Finnish ISAAC questionnaire on asthma against anti-asthmatic medication  
43 reimbursement database in 5-year-old children. *Clin Respir J* 2011;5:211-8. Doi:  
44 10.1111/j.1752-699X.2010.00222.x.  
45  
46  
47

48  
49 <sup>25</sup> Flohr C, Weinmayr G, Weiland SK (deceased), Addo-Yobo E, Annesi-Maesano I.  
50 How well do questionnaires perform compared with physical examination in detecting  
51 flexural eczema? Findings from the International Study of Asthma and Allergies in  
52  
53  
54  
55  
56  
57  
58  
59

1  
2  
3  
4 Childhood (ISAAC) Phase Two. *Br J Dermatol* 2009;161:846-53. Doi: 10.1111/j.1365-  
5 2133.2009.09261.x.

6  
7  
8 <sup>26</sup> Jousilahti P, Haahtela T, Laatikainen T, Mäkelä M, Vartiainen E. Asthma and  
9  
10 respiratory allergy prevalence is still increasing among Finnish young adults. *Eur*  
11  
12 *Respir J* 2016;47:985-987. Doi:10.1183/13993003.01702-2015.

13  
14 <sup>27</sup> Asher MI, Montefort S, Björkstén B, Lai CK, Strachan DP, Weiland SK, et al.  
15  
16 Worldwide time trends in the prevalence of symptoms of asthma, allergic  
17  
18 rhinoconjunctivitis, and eczema in childhood: ISAAC Phases One and Three repeat  
19  
20 multicountry cross-sectional surveys. *Lancet* 2006;368:733-43. Doi: 10.1016/S0140-  
21  
22 6736(06)69283-0.

23  
24  
25 <sup>28</sup> Masoli M, Fabian D, Holt S, Beasley R for the Global Initiative for Asthma (GINA)  
26  
27 Program. The global burden of asthma: executive summary of the GINA dissemination  
28  
29 committee report. *Allergy* 2004;59:469-478. Doi: 10.1111/j.1398-9995.2004.00526.x.

30  
31  
32 <sup>29</sup> NCD Risk factor collaboration. Trends in adult body-mass index in 200 countries  
33  
34 from 1975 to 2014: a pooled analysis of 1698 population-based measurement studies  
35  
36 with 19.2 million participants. *Lancet* 2016;387:1377-96. Doi: 10.1016/S0140-  
37  
38 6736(16)30054-X.

39  
40  
41 <sup>30</sup> Campbell DE, Boyle RJ, Thornton CA, Prescott SL. Mechanisms of allergic disease –  
42  
43 environmental and genetic determinants for the development of allergy. *Clin Exp*  
44  
45 *Allergy* 2015;45:844-858. Doi: 10.1111/cea.12531.

46  
47  
48 <sup>31</sup> Hersoug L-G, Linneberg A. The link between the epidemics of obesity and allergic  
49  
50 diseases: does obesity induce decreased immune tolerance? *Allergy* 2007;62:1205-13.  
51  
52 Doi: 10.1111/j.1398-9995.2007.01506.x.

- 1  
2  
3  
4 <sup>32</sup> Baiardini I, Braido F, Giardini A, Majani G, Cacciola C, Rogaku A, Scordamaglia A,  
5  
6 Canonica GW. Adherence to treatment: assessment of an unmet need in asthma. *J*  
7  
8 *Investig Allergol Clin Immunol* 2006;16(4):218-23. Free full text.  
9
- 10 <sup>33</sup> Teyhan A, Galobardes B, Henderson J. Child allergic symptoms and well-being at  
11  
12 school: Findings from ALSPAC, a UK cohort study. *J PLoS ONE*.  
13  
14 2015;10(8):e0135271. doi:10.1371/journal.pone.0135271.  
15
- 16 <sup>34</sup> Rutter M, Rutter M. *Developing minds. Challenge and continuity across the life span*.  
17  
18 England; Clays Ltd, 1993.
- 19 <sup>35</sup> Juniper EF. How important is quality of life in pediatric asthma? *Pediatr Pulmonol*  
20  
21 *Suppl* 1997;15:17-21. Doi: 10.1002/(SICI)1099-0496(199709)15+<17::AID-  
22  
23 PPUL5>3.0.CO;2-O.  
24  
25
- 26 <sup>36</sup> Tuckman A. The Potential Psychological Impact of Skin Conditions. *Dermatol Ther*  
27  
28 (Heidelb)2017;7(Suppl 1):53-57. doi: 10.1007/s13555-016-0169-7.  
29  
30
- 31 <sup>37</sup> Osman LR, Caldman C, Robertson R, et al. Symptoms, quality of life, and health  
32  
33 service contact among young adults with mild asthma. *Am J Respir Crit Care Med*  
34  
35 2000;61:498-503.  
36  
37
- 38 <sup>38</sup> Jago R, Searl A, Henderson AJ, Turner KM. Designing a physical activity  
39  
40 intervention for children with asthma: a qualitative study of the views of healthcare  
41  
42 professionals, parents and children with asthma. *BMJ Open* 2017;24:7(3):e014020.doi:  
43  
44 10.1136/bmjopen-2016-014020.  
45
- 46 <sup>39</sup> Cui W, Zack MM, HS Zahran. Health-related quality of life and asthma among  
47  
48 United States adolescents. *J Pediatr* 2015;166(2):358-364. Doi:  
49  
50 10.1016/j.jpeds.2014.10.005.  
51  
52  
53  
54  
55  
56  
57  
58  
59  
60

1  
2  
3  
4  
5  
6  
7  
8  
9  
10  
11  
12  
13  
14  
15  
16  
17  
18  
19  
20  
21  
22  
23  
24  
25  
26  
27  
28  
29  
30  
31  
32  
33  
34  
35  
36  
37  
38  
39  
40  
41  
42  
43  
44  
45  
46  
47  
48  
49  
50  
51  
52  
53  
54  
55  
56  
57  
58  
59  
60

---

<sup>40</sup> Akeson N, Worth A, Sheikh A. The psychosocial impact of anaphylaxis on young people and their parents. *Clin Exp Allergy* 2007;37:1213-20. Doi: 10.1111/j.1365-2222.2007.02758.x.

For peer review only

## STROBE Statement—checklist of items that should be included in reports of observational studies

|                                | Item No | Recommendation                                                                                                                                                                                                                                                                                                                                                                                                                                                                                                                                                                                                                                                                                                         |
|--------------------------------|---------|------------------------------------------------------------------------------------------------------------------------------------------------------------------------------------------------------------------------------------------------------------------------------------------------------------------------------------------------------------------------------------------------------------------------------------------------------------------------------------------------------------------------------------------------------------------------------------------------------------------------------------------------------------------------------------------------------------------------|
| ✓ Title and abstract           | 1       | (a) Indicate the study's design with a commonly used term in the title or the abstract, p. 1<br><br>(b) Provide in the abstract an informative and balanced summary of what was done and what was found, p. 2                                                                                                                                                                                                                                                                                                                                                                                                                                                                                                          |
| <b>Introduction</b>            |         |                                                                                                                                                                                                                                                                                                                                                                                                                                                                                                                                                                                                                                                                                                                        |
| ✓ Background/rationale         | 2       | Explain the scientific background and rationale for the investigation being reported, p. 4                                                                                                                                                                                                                                                                                                                                                                                                                                                                                                                                                                                                                             |
| ✓ Objectives                   | 3       | State specific objectives, including any prespecified hypotheses, p. 4                                                                                                                                                                                                                                                                                                                                                                                                                                                                                                                                                                                                                                                 |
| <b>Methods</b>                 |         |                                                                                                                                                                                                                                                                                                                                                                                                                                                                                                                                                                                                                                                                                                                        |
| ✓ Study design                 | 4       | Present key elements of study design early in the paper, p. 5                                                                                                                                                                                                                                                                                                                                                                                                                                                                                                                                                                                                                                                          |
| ✓ Setting                      | 5       | Describe the setting, locations, and relevant dates, including periods of recruitment, exposure, follow-up, and data collection, p. 5                                                                                                                                                                                                                                                                                                                                                                                                                                                                                                                                                                                  |
| ✓ Participants                 | 6       | (a) <i>Cohort study</i> —Give the eligibility criteria, and the sources and methods of selection of participants. Describe methods of follow-up<br><br><i>Case-control study</i> —Give the eligibility criteria, and the sources and methods of case ascertainment and control selection. Give the rationale for the choice of cases and controls<br><br><i>Cross-sectional study</i> —Give the eligibility criteria, and the sources and methods of selection of participants, p. 5<br><br>(b) <i>Cohort study</i> —For matched studies, give matching criteria and number of exposed and unexposed<br><br><i>Case-control study</i> —For matched studies, give matching criteria and the number of controls per case |
| ✓ Variables                    | 7       | Clearly define all outcomes, exposures, predictors, potential confounders, and effect modifiers. Give diagnostic criteria, if applicable, p. 5-7                                                                                                                                                                                                                                                                                                                                                                                                                                                                                                                                                                       |
| ✓ Data sources/<br>measurement | 8*      | For each variable of interest, give sources of data and details of methods of assessment (measurement). Describe comparability of assessment methods if there is more than one group, p. 5-7                                                                                                                                                                                                                                                                                                                                                                                                                                                                                                                           |
| ✓ Bias                         | 9       | Describe any efforts to address potential sources of bias, p. 7                                                                                                                                                                                                                                                                                                                                                                                                                                                                                                                                                                                                                                                        |

|    |                          |    |                                                                          |
|----|--------------------------|----|--------------------------------------------------------------------------|
| 1  | ✓ Study size             | 10 | Explain how the study size was arrived at, p. 5                          |
| 2  |                          |    |                                                                          |
| 3  | ✓ Quantitative variables | 11 | Explain how quantitative variables were handled in the analyses.         |
| 4  |                          |    | If applicable, describe which groupings were chosen and why, p.          |
| 5  |                          |    | 7                                                                        |
| 6  |                          |    |                                                                          |
| 7  | ✓ Statistical methods    | 12 | (a) Describe all statistical methods, including those used to            |
| 8  |                          |    | control for confounding, p. 7                                            |
| 9  |                          |    |                                                                          |
| 10 |                          |    | (b) Describe any methods used to examine subgroups and                   |
| 11 |                          |    | interactions                                                             |
| 12 |                          |    |                                                                          |
| 13 |                          |    | (c) Explain how missing data were addressed                              |
| 14 |                          |    |                                                                          |
| 15 |                          |    | (d) <i>Cohort study</i> —If applicable, explain how loss to follow-up    |
| 16 |                          |    | was addressed                                                            |
| 17 |                          |    |                                                                          |
| 18 |                          |    | <i>Case-control study</i> —If applicable, explain how matching of cases  |
| 19 |                          |    | and controls was addressed                                               |
| 20 |                          |    |                                                                          |
| 21 |                          |    | <i>Cross-sectional study</i> —If applicable, describe analytical methods |
| 22 |                          |    | taking account of sampling strategy, p. 5                                |
| 23 |                          |    |                                                                          |
| 24 |                          |    | (e) Describe any sensitivity analyses                                    |

Continued on next page

**Results**

|   |                  |     |                                                                                                                                                                                                                    |
|---|------------------|-----|--------------------------------------------------------------------------------------------------------------------------------------------------------------------------------------------------------------------|
| ✓ | Participants     | 13* | (a) Report numbers of individuals at each stage of study—eg numbers potentially eligible, examined for eligibility, confirmed eligible, included in the study, completing follow-up, and analysed, p. 12           |
|   |                  |     | (b) Give reasons for non-participation at each stage                                                                                                                                                               |
|   |                  |     | (c) Consider use of a flow diagram                                                                                                                                                                                 |
| ✓ | Descriptive data | 14* | (a) Give characteristics of study participants (eg demographic, clinical, social) and information on exposures and potential confounders, p. 7-8, 12                                                               |
|   |                  |     | (b) Indicate number of participants with missing data for each variable of interest                                                                                                                                |
|   |                  |     | (c) <i>Cohort study</i> —Summarise follow-up time (eg, average and total amount)                                                                                                                                   |
| ✓ | Outcome data     | 15* | <i>Cohort study</i> —Report numbers of outcome events or summary measures over time                                                                                                                                |
|   |                  |     | <i>Case-control study</i> —Report numbers in each exposure category, or summary measures of exposure                                                                                                               |
|   |                  |     | <i>Cross-sectional study</i> —Report numbers of outcome events or summary measures, p. 5                                                                                                                           |
| ✓ | Main results     | 16  | (a) Give unadjusted estimates and, if applicable, confounder-adjusted estimates and their precision (eg, 95% confidence interval). Make clear which confounders were adjusted for and why they were included, p.12 |
|   |                  |     | (b) Report category boundaries when continuous variables were categorized                                                                                                                                          |
|   |                  |     | (c) If relevant, consider translating estimates of relative risk into absolute risk for a meaningful time period                                                                                                   |
| ✓ | Other analyses   | 17  | Report other analyses done—eg analyses of subgroups and interactions, and sensitivity analyses                                                                                                                     |

**Discussion**

|   |                  |    |                                                                                                                                                                                     |
|---|------------------|----|-------------------------------------------------------------------------------------------------------------------------------------------------------------------------------------|
| ✓ | Key results      | 18 | Summarise key results with reference to study objectives, p. 8-10                                                                                                                   |
| ✓ | Limitations      | 19 | Discuss limitations of the study, taking into account sources of potential bias or imprecision. Discuss both direction and magnitude of any potential bias, p. 10                   |
| ✓ | Interpretation   | 20 | Give a cautious overall interpretation of results considering objectives, limitations, multiplicity of analyses, results from similar studies, and other relevant evidence, p. 9-10 |
| ✓ | Generalisability | 21 | Discuss the generalisability (external validity) of the study results, p. 9                                                                                                         |

**Other information**

- 1  
2  
3  
4  
5  
6  
7  
8  
9
- ✓ Funding 22 Give the source of funding and the role of the funders for the present study and, if applicable, for the original study on which the present article is based, p. 11

\*Give information separately for cases and controls in case-control studies and, if applicable, for exposed and unexposed groups in cohort and cross-sectional studies.

10  
11  
12  
13  
14  
15  
16  
17  
18  
19  
20  
21  
22  
23  
24  
25  
26  
27  
28  
29  
30  
31  
32  
33  
34  
35  
36  
37  
38  
39  
40  
41  
42  
43  
44  
45  
46  
47  
48  
49  
50  
51  
52  
53  
54  
55  
56  
57  
58  
59  
60

**Note:** An Explanation and Elaboration article discusses each checklist item and gives methodological background and published examples of transparent reporting. The STROBE checklist is best used in conjunction with this article (freely available on the Web sites of PLoS Medicine at <http://www.plosmedicine.org/>, Annals of Internal Medicine at <http://www.annals.org/>, and Epidemiology at <http://www.epidem.com/>). Information on the STROBE Initiative is available at [www.strobe-statement.org](http://www.strobe-statement.org).



# BMJ Open

## The association of allergic diseases with children's life satisfaction: population-based study in Finland

|                                 |                                                                                                                                                                                                                                                                                                                                                                                                                                                                                                                        |
|---------------------------------|------------------------------------------------------------------------------------------------------------------------------------------------------------------------------------------------------------------------------------------------------------------------------------------------------------------------------------------------------------------------------------------------------------------------------------------------------------------------------------------------------------------------|
| Journal:                        | <i>BMJ Open</i>                                                                                                                                                                                                                                                                                                                                                                                                                                                                                                        |
| Manuscript ID                   | bmjopen-2017-019281.R2                                                                                                                                                                                                                                                                                                                                                                                                                                                                                                 |
| Article Type:                   | Research                                                                                                                                                                                                                                                                                                                                                                                                                                                                                                               |
| Date Submitted by the Author:   | 05-Feb-2018                                                                                                                                                                                                                                                                                                                                                                                                                                                                                                            |
| Complete List of Authors:       | Haanpää, Leena; Turun Yliopisto, Child and Youth Research Institute; Turun Yliopisto, Department of Social Sciences<br>af Ursin, Piia; Turun yliopisto Kliininen laitos, Child and Youth Research Institute; Turun Yliopisto, Department of Education<br>Nermes, Merja; Turun yliopisto Kliininen laitos, Department of Paediatrics; TYKS<br>Kaljonen, Anne; Turun Yliopisto, Department of Biostatistics<br>Isolauri, Erika; Turun yliopisto Kliininen laitos, Department of Pediatrics and Adolescent Medicine; TYKS |
| <b>Primary Subject Heading</b>: | Dermatology                                                                                                                                                                                                                                                                                                                                                                                                                                                                                                            |
| Secondary Subject Heading:      | Dermatology                                                                                                                                                                                                                                                                                                                                                                                                                                                                                                            |
| Keywords:                       | Eczema < DERMATOLOGY, Paediatric dermatology < DERMATOLOGY, Paediatric dermatology < PAEDIATRICS                                                                                                                                                                                                                                                                                                                                                                                                                       |
|                                 |                                                                                                                                                                                                                                                                                                                                                                                                                                                                                                                        |

SCHOLARONE™  
Manuscripts

only

# The association of allergic diseases with children's life satisfaction: population-based study in Finland

Leena Haanpää, Piia af Ursin, Merja Nermes, Anne Kaljonen, Erika Isolauri

Child and Youth Research Institute, University of Turku, FI-20014 Turku, Finland, Department of Social Sciences, University of Turku, FI-20014 Turku, Finland, Leena Haanpää senior researcher; Child and Youth Research Institute, University of Turku, FI-20014 Turku, Finland, Department of Education, University of Turku, FI-20014 Turku, Finland, Piia af Ursin senior researcher; Department of Paediatric and Adolescent Medicine, Turku University Hospital, Finland, FI-20521 Turku, Finland, Merja Nermes MD, PhD; Faculty of Medicine, Department of Biostatistics, University of Turku, 20014 FI-Turku, Finland, Anne Kaljonen bio-statistician; Department of Paediatrics, Institute of Clinical Medicine, University of Turku, 20014 FI-Turku, Finland, Department of Paediatric and Adolescent Medicine, Turku University Hospital, FI-20521 Turku, Finland, Erika Isolauri Professor

**Correspondence to:** lehaan@utu.fi

The Corresponding Author has the right to grant on behalf of all authors and does grant on behalf of all authors, a worldwide licence to the Publishers and its licensees in perpetuity, in all forms, formats and media (whether known now or created in the future), to i) publish, reproduce, distribute, display and store the Contribution, ii) translate the Contribution into other languages, create adaptations, reprints, include within collections and create summaries, extracts and/or, abstracts of the Contribution, iii) create any other derivative work(s) based on the Contribution, iv) to exploit all subsidiary rights in the Contribution, v) the inclusion of electronic links from the Contribution to third party material wherever it may be located; and, vi) licence any third party to do any or all of the above.

**Number of words:** 4650

## Abstract

**Objective:** To assess the impact of allergic diseases on the subjective well-being and life satisfaction of primary school children.

**Design:** Population-based cohort.

**Setting:** Finnish sample of children ages 10 and 12 from the International Survey of Children's Well-Being.

**Participants:** Nationally representative sample of 1947 school children.

**Main outcome measure:** Two different instruments to assess the child's own perception of well-being; the short version of the Student Life Satisfaction Scale (SLSS) and the Brief Multidimensional Student Life Satisfaction Scale (BMSLSS).

**Results:** Altogether, 51.4% of children reported having at least one allergic condition (10.1% asthma, 23.8% eczema, and 40.3% seasonal allergic rhinitis). A statistically significant distinction in life satisfaction emerged between non-allergic and allergic children (inferior in the latter). In particular, children with eczema were more likely to report a reduction in life satisfaction compared to non-allergic children (SLSS  $\beta = -128.220$ ; BMSLSS  $\beta = -90.694$ ;  $p < 0.01$ ). Apart from freedom from eczema, good life satisfaction was associated with a physically active life style.

**Conclusions:** Active allergic disease reduces the child's own perception of well-being. During clinical visits, more attention should be paid to the child's psychosocial status and impairments, which may differ substantially from those of parents or medical authorities.

**Keywords:** allergy; asthma; eczema; life satisfaction, physical activity

### Strengths and limitations of this study

- The first nationally representative survey on subjective life satisfaction in primary-school children in Finland.
- The first national study that observed allergic diseases with relation to children's life satisfaction.
- The study did not directly and objectively assess the allergy symptoms in question. The research focus was on children's own perception of life-satisfaction rather than on disease severity.
- The data used in the present study are cross-sectional, and any causal relationship between the predictors and outcome variables thus remains obscure.

## INTRODUCTION

Societies worldwide are faced with a progressively increasing risk of immune-mediated health problems such as allergic, autoimmune, and inflammatory diseases, and the velocity of propagation is highest in children.<sup>1 2</sup> Allergic diseases, the first manifestation of these conditions, comprise the most common chronic disease among children, with a prevalence ranging from 7% (eczema) to 14.6% (asthma and rhinitis) in 13- to 14-year-old children.<sup>3</sup> Thus, allergic diseases represent a significant burden not only for society and the family but also for the affected individual.

The severity of allergic disease is assessed by the extent of symptoms in daily life. A vicious circle of symptoms of allergic disease such as allergy flares and emotional stress has been documented, and these symptoms can potentially contribute to the experienced burden of the disease.<sup>4</sup> Despite a growing interest in life satisfaction during childhood, little is known about how chronic diseases such as asthma or eczema affect children's subjective well-being (SWB), that is, psychosocial contentment. In fact, the burden of allergic disorders may extend well beyond mere physical functioning.

Youth with a chronic illness are at increased risk for poor self-concept<sup>5</sup> and show significantly higher rates of emotional and behavioural problems.<sup>6</sup> Self-concept, as a fundamental part of a child's psychological function, is strongly affected by parental and peer approval, physical appearance and perceived competence in domains of importance, such as athletics.<sup>7</sup> For example, for children with asthma, a decreased quality of life has been found to be related to limited activities and participation in sports.<sup>8</sup>

The importance of the disease burden may culminate in children, whose recognition of self and self-esteem are still evolving, and thus disease may have a long-term impact on personal well-being and quality of life.<sup>6 9 10 11</sup> In the medical literature,

1  
2  
3 quality of life refers to a 'uniquely personal perception, denoting the way that individual  
4 patients feel about their health status and/or nonmedical aspects of their lives'.<sup>12</sup> On one  
5 hand, health is considered a major component affecting one's quality of life and on the  
6 other hand, good quality of life is an important outcome of successful treatment of  
7 diseases.<sup>8</sup>

8  
9  
10  
11  
12  
13 The objective of the study presented here was to assess the impact of allergic  
14 diseases on subjective well-being and life satisfaction among primary-school children.  
15 Conventionally, children's well-being has been determined indirectly, using proxies  
16 such as household income, mortality, or life expectancy or using parental reports on  
17 child well-being,<sup>13 14</sup> thus ignoring the child's own point of view. However, children's  
18 and parents' perceptions of a child's quality of life often differ; thus, obtaining  
19 information directly from the child is advisable.<sup>9 12</sup> Another gap in the research literature  
20 regards the lack of attention to ethnically and racially diverse samples.<sup>10 15 16</sup> Research  
21 on racially diverse groups of children with allergic diseases would increase our  
22 knowledge of the association between allergy and childhood quality of life in  
23 populations of children who may already be at increased risk of impaired well-being.<sup>10</sup>

24  
25  
26  
27  
28  
29  
30  
31  
32  
33  
34  
35  
36  
37  
38  
39  
40  
41  
42  
43  
44  
45  
46  
47  
48  
49  
50  
51  
52  
53  
54  
55  
56  
57  
58  
59  
60  
Recent research has provided tools that can be used to evaluate self-reported  
perceptions of quality of life, satisfaction, or other emotional and behavioural elements  
of children's lives.<sup>17</sup> In the context of allergic diseases, we applied for the first time two  
summary measures of life satisfaction: the Student Life Satisfaction Scale (SLSS,  
measuring children's overall life satisfaction) and the Brief Multidimensional Student  
Life Satisfaction Scale (BMSLSS, measuring children's overall life satisfaction).<sup>17 18 19</sup>

## METHODS

## Study population and setting

This study is part of an international Children's Worlds survey (<http://www.isciweb.org>),<sup>20</sup> which is an international survey on school-aged children's subjective well-being. The purpose of the study is to improve children's well-being by creating awareness among children, their parents, and their communities, as well as among other parties involved in children's lives, such as policy decision makers or teachers. The study was approved by the Ethics Committee of the University of Turku (statement obtained 15 February 2016). Cross-sectional data collected in Finland were used, comprising a random selection of nationally representative data from 43 primary schools (35 classes of 4<sup>th</sup> graders, 39 classes of 6<sup>th</sup> graders). Informed consent was obtained from the participants and their parents prior to administering the survey. Finally, in each school at least 40 pupils in each of grades 4 and 6 were recruited. In total, 1947 pupils (67.6% response rate; 48.7% boys; mean age, 11 years) completed an online anonymous questionnaire.

## Outcome variables

### Global life satisfaction

A reduced version of Huebner's<sup>17</sup> SLSS was expanded by one item assessing children's overall life satisfaction ('the things in my life are excellent'), adapted from Diener.<sup>18</sup> The SLSS hypothesizes that children are able to formulate judgments of their overall life satisfaction over and above judgments concerning specific domains (e.g., family, friends, community).<sup>17</sup> Instead of asking about dissatisfaction and negative life judgments, the SLSS focuses on positive, affective conceptualizations of the child's life. This provides information that is complementary to children's own perceptions of their

1  
2  
3 optimal development. The internal consistency of the SLSS items was tested via  
4  
5 Cronbach's alpha, resulting in  $\alpha = 0.94$ , indicating internal consistency and reliability.  
6

### 7 Domain-specific life satisfaction

8  
9 The BMSLSS<sup>19</sup> measures satisfaction in life in more general terms than the SLSS. The  
10  
11 evaluation covers five important life domains, using one item per domain: family life,  
12  
13 friendships, school experience, body image, and child's living environment ( $\alpha = 0.78$ ).  
14

### 15 Scoring and validity

16  
17 In both scales, the scoring system was modified from the original version (1 = 'Strongly  
18  
19 disagree' to 6 = 'Strongly agree') to an 11-point scale (0–10). A higher score reflects  
20  
21 higher life satisfaction. After calculating the mean of all five items, the subscales were  
22  
23 summed and transformed into a scale of 0–100.  
24  
25

26  
27 SLSS and BMSLSS are validated measures of children's experiences of life  
28  
29 satisfaction including psychometric properties, targeted to age groups from 8 to 18  
30  
31 years. These measures have been successfully used in other experience sampling  
32  
33 studies; however, to date only a few studies have used them in the context of chronic  
34  
35 conditions.<sup>21 22</sup>  
36  
37  
38

### 39 **Characterization of the allergic conditions**

40  
41 Three questions, modified from the ISAAC Phase One core questionnaires investigating  
42  
43 the prevalence of doctor-diagnosed asthma, allergic rhinitis, and eczema in children  
44  
45 worldwide,<sup>23</sup> were used to characterize allergic disease among the study population. In  
46  
47 Finland, the ISAAC core questions on asthma have been validated against anti-  
48  
49 asthmatic medication reimbursement data from the Finnish Social Insurance Institution  
50  
51 and were found to be highly valid.<sup>24</sup> The participants were asked whether they used  
52  
53 inhaled asthma medication (no/yes) prescribed by a doctor. In like manner, children  
54  
55  
56  
57  
58  
59  
60



1  
2  
3 were asked about the presence of itchy rash sometimes appearing and disappearing  
4 (no/yes), which was interpreted to represent atopic eczema. Although ISAAC questions  
5 on eczema have not been specifically validated in the Finnish language, it has been  
6 shown that, in general, ISAAC-questionnaire-derived symptom prevalence is  
7 sufficiently precise at the population level.<sup>25</sup> Runny or blocked nose and sneezing in  
8 seasons of birch pollen or hay (no/yes) was considered to represent seasonal allergic  
9 rhinitis in Finland.  
10  
11  
12  
13  
14  
15  
16

### 17 18 19 20 **Data on background variables**

21 Self-reported sex, age, ethnic background and parent's employment status were used as  
22 socio-demographic background variables. Children were asked for the employment  
23 status of both parents (mother and father working: yes, no, do not know) and a recoded  
24 variable was formed (parents working: no, yes). Ethnic background was determined  
25 based on three items: were you / your mother / your father born in Finland (yes, no, I  
26 am not sure). Additionally, we used data on pets (a pet in the family when the child was  
27 born or currently in the household; yes, no, I do not know). After-school physical  
28 activity (sports or exercising) was self-reported.  
29  
30  
31  
32  
33  
34  
35  
36  
37  
38  
39  
40  
41

### 42 **Statistical analysis**

43 Continuous non-normally distributed SLSS and BMSLSS outcome variables were  
44 characterized using means, standard deviations, medians and mean ranks. Ranks,  
45 counted over the total data, were used in analyses because of the extremely left skewed  
46 distributions of the outcome variables SLSS and BMSLSS. Student's *t*-test for  
47 independent samples was applied in comparisons between variables. In the second  
48 phase of analysis, the significant background variables from both SLSS and BMSLSS  
49  
50  
51  
52  
53  
54  
55  
56  
57  
58  
59  
60

1  
2  
3 and all five asthma variables (A pet when born, A pet now, Asthma, Eczema, Perennial  
4 rhinitis) were subjected to linear regression analysis. The interactions were evaluated,  
5 but all were excluded as non-significant from the final regression models. Imputation of  
6 the data was not applied to statistical analysis. However, the analyses were conducted  
7 using weighting coefficients calculated for Finnish data.<sup>20</sup> This takes into account non-  
8 response, varying probabilities of selection, and variations between characteristics of  
9 the sample and the population from which the sample was drawn. Statistical analyses  
10 were carried out using SAS for Windows version 9.4 (SAS, Cary, NC, USA) and *p*-  
11 values below 0.05 were considered statistically significant.  
12  
13  
14  
15  
16  
17  
18  
19  
20  
21  
22  
23

## 24 RESULTS

25  
26 Overall, the Finnish children in this study evaluated their well-being as excellent; more  
27 than 80% of 10- and 12-years-olds were very satisfied with their lives. Altogether,  
28 51.4% (*n* = 965) reported having at least one allergic disease – 10.1% (*n* = 188) doctor-  
29 diagnosed asthma, 23.8% (*n* = 452) eczema, and 40.3% (*n* = 769) seasonal allergic  
30 rhinitis.  
31  
32  
33  
34  
35  
36

37 A significant difference in life satisfaction emerged between non-allergic and  
38 allergic children on both scales (Table 1). In particular, eczema was associated with  
39 reduced well-being when compared with children not manifesting atopic eczema: the  
40 difference on both scales was statistically significant (SLSS, *p* < 0.001; BMSLSS, *p* <  
41 0.01). In contrast, no associations were detected between asthma or allergic rhinitis and  
42 life satisfaction. It is of note that all subjects with an asthma diagnosis were on  
43 prescribed inhaled asthma medication. An additional correlation analysis showed that  
44 all the domains of BMSLSS were statistically significantly associated with eczema. The  
45 most affected domain was body image (*r* = -0.10, *p* < 0.001).  
46  
47  
48  
49  
50  
51  
52  
53  
54  
55  
56  
57  
58  
59  
60

1  
2  
3 The determinants of good life satisfaction were measured by a multivariable  
4 model (Table 2). Children not having eczema, aged 10 years (grade 4), with working  
5 parents and a physically active life style were found to be more satisfied with their lives  
6 than other children. Having had pets in early infancy or having pets currently had no  
7 impact on life satisfaction.  
8  
9  
10  
11  
12

13 Taken together, the strongest predictor of good life satisfaction was a physically  
14 active life style ( $\beta = 194.05, p < .001$ ), while reduced life satisfaction was correlated  
15 with eczema ( $\beta = -128.22, p < 0.001$ ).  
16  
17  
18  
19  
20  
21

## 22 **DISCUSSION**

23  
24 This study, which is the first nationally representative survey on subjective life  
25 satisfaction and allergic diseases in primary-school children, revealed that active  
26 allergic disease is a major determinant of children's well-being in various domains. In  
27 particular, eczema was seen to reduce both global life satisfaction related to children's  
28 moods and feelings (SLSS) and life satisfaction as measured across broader domains of  
29 living (BMSLSS). In accord with national<sup>26</sup> and international<sup>27</sup> reports, half of the  
30 children in the studied sample reported having at least one allergic condition, indicating  
31 that our results may be generalizable.  
32  
33  
34  
35  
36  
37  
38  
39  
40

41 Not only do allergic diseases comprise the most common chronic disorder of  
42 childhood;<sup>28</sup> they also represent the first manifestation of the growing epidemic of non-  
43 communicable diseases,<sup>29</sup> which tend to share environmental risk factors and patho-  
44 mechanisms and frequently coexist.<sup>2 30 31</sup> Besides their well-known economic burden,  
45 chronic diseases exert a substantial psychosocial impact on children and their families.  
46 This notwithstanding, health-related quality of life research has only recently attracted  
47 scientific interest.<sup>22 32 33</sup>  
48  
49  
50  
51  
52  
53  
54  
55  
56  
57  
58  
59  
60

1  
2  
3 The importance of life satisfaction may be highest in childhood. Children,  
4 specifically those on the very edge of puberty, are vulnerable to external influences such  
5 as peer acceptance.<sup>34</sup> This phase of life is especially important with regards to self-  
6 acceptance and relation to self. As also demonstrated in this study, younger children  
7 were more content in terms of their life satisfaction than older ones. Hence, our study  
8 results tend to substantiate those of previous research<sup>5</sup> according to which age is related  
9 to perceptions of well-being, for example in the context of emotional well-being.  
10 However, the lack of interaction between the variables of age, allergies, and life  
11 satisfaction indicates that the experience of life satisfaction is influenced by the burdens  
12 presented by allergies and age individually.  
13  
14  
15  
16  
17  
18  
19  
20  
21  
22  
23

24 Previous studies mainly on adult populations indicate that active allergic diseases  
25 are related to decreased well-being, as manifested in fewer relationships, limited daily  
26 functioning and decreased self-acceptance, as well as decreased emotional well-being.<sup>32</sup>  
27  
28  
29  
30  
31  
32  
33  
34  
35  
36  
37  
38  
39  
40  
41  
42  
43  
44  
45  
46  
47  
48  
49  
50  
51  
52  
53  
54  
55  
56  
57  
58  
59  
60

33 35 36 Our results further underline that allergic diseases not only affect separate domains of children's lives but also have a holistic effect; the intricacy of the allergic burden is manifested in children's overall life satisfaction. For example, skin conditions distress psychosocial well-being by virtue of the stigma resulting from the visibility of dermatological symptoms.<sup>33</sup> Furthermore, children with persistent or late-onset eczema or with persistent wheeze were demonstrated to have psychosocial problems at school.<sup>33</sup>

Our study results show no association between ethnic background, allergic diseases, and life satisfaction. This suggests that the impact of allergic diseases does not differ between ethnically Finnish children and children with an immigrant background. Parental employment status was significantly related to life satisfaction, indicating that children of working parents were more satisfied with their lives than those of non-working parents. This association, however, was not associated with allergic diseases.

1  
2  
3 In the present study, respiratory allergy seemed to have less influence on  
4 children's life-satisfaction than eczema. An alternative explanation would be that the  
5 absence of effects indicates that the symptoms of these allergies are treatable.  
6  
7 Interestingly, previous studies suggest that symptom-free patients report better well-  
8  
9 being than the population on average,<sup>37</sup> suggesting that it is not the chronic disease *per*  
10  
11 *se* which impacts the quality of life of those affected but the manifestations thereof  
12  
13 (symptoms). Treating asthma promotes a physically active life style,<sup>38</sup> and a physically  
14  
15 active life style was strongly associated with life satisfaction in the present survey.  
16  
17 Thus, the benefit of balanced asthma treatment may extend far beyond physical health  
18  
19 to psychosocial consequences and overall improvements in the quality of life.<sup>39</sup>  
20  
21  
22  
23

24 This study was the first to investigate the subjectively measured quality of life  
25  
26 focusing on children with or without allergic diseases in a large, nationally  
27  
28 representative, sample of 10–12-year-old Finnish children. However, some limitations  
29  
30 of this study need to be acknowledged. Firstly, the study did not directly and objectively  
31  
32 assess the symptoms in question. Rather, the research focused on children's own  
33  
34 perception of disease severity. Similarly, there is a potential for error in children's  
35  
36 reports of parental employment status and pet ownership at child's birth. Using  
37  
38 objective measures or medical records to verify diagnoses and disease severity and, for  
39  
40 instance, parental reports to verify employment status is one way for future studies to  
41  
42 improve upon the current study assessing self-reported diseases as correlates of  
43  
44 children's life satisfaction. Lastly, the data used in the present study are cross-sectional,  
45  
46 and any causal relationship between the predictors and outcome variables thus remains  
47  
48 obscure.  
49  
50  
51

52 Taken together, our results suggest a call to monitor the psychological well-being  
53  
54 of children affected by allergic diseases, which are the most common chronic diseases  
55  
56  
57  
58  
59  
60

1  
2  
3 in childhood. In medical care, consideration should be given to the children's perceived  
4 impairments,<sup>37</sup> as these may differ substantially from the perceptions of parents or  
5 medical authorities.<sup>40</sup>  
6  
7  
8  
9

10  
11 **Contributors:** L. Haanpää drafted the final version of this manuscript, and all authors  
12 (L. Haanpää, P. af Ursin, M. Nermes, A. Kaljonen, E. Isolaure) drafted different sections  
13 and paragraphs of this work, critically revised this work for important intellectual  
14 content, approved the final version to be published, and agreed on the accuracy and  
15 integrity of this work. All authors had full access to all of the data (including statistical  
16 reports and tables) in the study and can take responsibility for the integrity of the data  
17 and the accuracy of the data analysis.  
18  
19

20  
21 **Funding:** This work was supported by the Juho Vainio Foundation.  
22  
23

24  
25 **Competing interests:** All authors have completed the ICMJE uniform disclosure form  
26 at [www.icmje.org/coi\\_disclosure.pdf](http://www.icmje.org/coi_disclosure.pdf) and declare the following: no support from any  
27 organisation for the submitted work; no financial relationships with any organisations  
28 that might have an interest in the submitted work in the previous three years; no other  
29 relationships or activities that could appear to have influenced the submitted work.  
30  
31

32  
33 **Ethical approval:** This study was approved by the Ethics Committee of the University  
34 of Turku.  
35  
36

37  
38 **Data sharing:** No additional data available.  
39  
40

41  
42 **Transparency:** The lead author (LH) affirms that the manuscript is an honest, accurate,  
43 and transparent account of the study being reported; that no important aspects of the  
44 study have been omitted; and that any discrepancies from the study as planned have  
45 been explained.  
46  
47  
48  
49  
50  
51  
52  
53  
54  
55  
56  
57  
58  
59  
60

**Table 1.** Socio-economic background variables, pet status, and allergy variables affecting children's life satisfaction analysed by t-test for independent samples.\*

|                          | <i>n</i> | SLSS       |    |           | <i>p</i> | BMSLSS   |            |    | <i>p</i> |
|--------------------------|----------|------------|----|-----------|----------|----------|------------|----|----------|
|                          |          | Mean(sd)   | Md | Mean rank |          | <i>n</i> | Mean(sd)   | Md |          |
| <b>Gender</b>            |          |            |    |           | 0.7642   |          |            |    | 0.0685   |
| <b>boy</b>               | 946      | 90.3(14.0) | 96 | 824.7     |          | 867      | 88.8(11.4) | 92 | 807.4    |
| <b>girl</b>              | 998      | 89.8(14.8) | 96 | 818.9     |          | 938      | 89.3(12.1) | 92 | 848.5    |
| <b>Grade</b>             |          |            |    |           | <0.0001  |          |            |    | <0.0001  |
| <b>4</b>                 | 942      | 91.0(14.4) | 96 | 864.4     |          | 863      | 90.7(11.4) | 94 | 924.9    |
| <b>6</b>                 | 1002     | 89.2(14.4) | 94 | 781.6     |          | 942      | 87.5(11.8) | 90 | 740.7    |
| <b>Born in Finland</b>   |          |            |    |           | 0.6146   |          |            |    | 0.1949   |
| <b>no</b>                | 1880     | 90.1(14.5) | 96 | 822.6     |          | 1743     | 89.1(11.7) | 92 | 831.5    |
| <b>yes</b>               | 64       | 89.8(12.7) | 96 | 795.4     |          | 62       | 86.7(13.6) | 90 | 751.3    |
| <b>Parents working</b>   |          |            |    |           | <0.0295  |          |            |    |          |
| <b>no</b>                | 577      | 88.8(16.0) | 94 | 794.5     |          | 542      | 88.2(12.9) | 92 | 808.0    |
| <b>yes</b>               | 1342     | 90.9(13.4) | 96 | 840.2     |          | 1241     | 89.6(10.9) | 92 | 845.3    |
| <b>Doing sports</b>      |          |            |    |           | <0.0020  |          |            |    | <0.0001  |
| <b>no</b>                | 78       | 83.1(21.4) | 94 | 678.2     |          | 65       | 79.8(16.4) | 82 | 511.4    |
| <b>yes</b>               | 1803     | 90.4(14.0) | 96 |           |          | 1686     | 89.4(11.4) | 92 | 843.8    |
| <b>A pet when born</b>   |          |            |    |           | 0.1852   |          |            |    | 0.3060   |
| <b>no</b>                | 962      | 90.4(13.3) | 96 | 841.4     |          | 894      | 89.6(11.1) | 92 | 849.6    |
| <b>yes</b>               | 766      | 89.3(15.9) | 96 | 814.2     |          | 711      | 88.7(12.6) | 92 | 824.9    |
| <b>A pet now</b>         |          |            |    |           | 0.3202   |          |            |    | =0.0102  |
| <b>no</b>                | 703      | 90.5(13.8) | 96 | 835.7     |          | 660      | 89.9(11.3) | 92 | 867.0    |
| <b>yes</b>               | 1227     | 89.8(14.7) | 96 | 815.7     |          | 1132     | 88.5(12.0) | 92 | 806.7    |
| <b>Asthma</b>            |          |            |    |           | 0.5263   |          |            |    | 0.8561   |
| <b>no</b>                | 1678     | 90(14.2)   | 96 | 817.6     |          | 1566     | 89.0(11.6) | 92 | 827.2    |
| <b>yes</b>               | 191      | 89.3(16.9) | 96 | 838.2     |          | 174      | 88.3(13.7) | 92 | 820.2    |
| <b>Eczema</b>            |          |            |    |           | <0.0001  |          |            |    | =0.0018  |
| <b>no</b>                | 1446     | 90.8(13.7) | 96 | 843.3     |          | 1350     | 89.6(11.0) | 92 | 848.5    |
| <b>yes</b>               | 452      | 87.5(16.6) | 92 | 745.8     |          | 414      | 87.2(13.4) | 90 | 764.6    |
| <b>Seasonal rhinitis</b> |          |            |    |           | 0.6494   |          |            |    | 0.6441   |
| <b>no</b>                | 1140     | 89.9(14.6) | 96 | 816.0     |          | 1061     | 89.0(11.6) | 92 | 823.5    |
| <b>yes</b>               | 764      | 90.0(14.3) | 96 | 825.1     |          | 709      | 89.1(11.9) | 92 | 834.2    |

\*By Kruskal-Wallis non-parametric tests.

**Table 2.** Children's life satisfaction explained by grade, parental employment status, physical activity, pet status, and allergy variables.\*

|                          | SLSS     |        |          | BMSLSS   |        |          |
|--------------------------|----------|--------|----------|----------|--------|----------|
|                          | $\beta$  | SE     | <i>p</i> | $\beta$  | SE     | <i>p</i> |
| <b>Grade</b>             | -60.880  | 13.799 | <0.001   | -106.225 | 13.322 | <0.001   |
| <b>Parents working</b>   | 65.682   | 30.324 | <0.05    | 70.065   | 29.141 | <0.05    |
| <b>Doing sports</b>      | 194.053  | 67.723 | <0.001   | 307.704  | 68.914 | <0.001   |
| <b>A pet when born</b>   | -22.414  | 29.734 | 0.4511   | -7.676   | 28.794 | 0.7898   |
| <b>A pet now</b>         | -28.816  | 30.597 | 0.3464   | -47.133  | 29.577 | 0.1113   |
| <b>Asthma</b>            | 60.220   | 46.539 | 0.1959   | 1.662    | 45.248 | 0.9707   |
| <b>Eczema</b>            | -128.220 | 32.575 | <0.01    | -90.694  | 31.441 | <0.01    |
| <b>Seasonal rhinitis</b> | 29.331   | 29.015 | 0.3122   | 19.440   | 27.947 | 0.4868   |

\*By linear regression analysis.



## REFERENCES

- <sup>1</sup> Bach JF. The effect of infections on susceptibility to autoimmune and allergic diseases. *N Engl J Med*. 2002;347;12:911-920. Doi: 10.1056/NEJMra020100.
- <sup>2</sup> Rautava S, Luoto R, Salminen S, Isolauri E. Microbial contact during pregnancy, intestinal colonization and human disease. *Nat. Rev. Gastroenterol. Hepatol*. 2012;9:565-576. doi: 10.1038/nrgastro.2012.144.
- <sup>3</sup> Mallol J, Crane J, von Mutius E, Odhiambo J, Keil U, Stewart A. The international study of asthma and allergies in childhood (ISAAC) phase three: a global synthesis. *Allergol Immunopathol (Madr)* 2013;41(2):73-85. doi: 10.1016/j.aller.2012.03.001.
- <sup>4</sup> Patterson AM, Yildiz VO, Klatt MD, Malarkey WB. *Perceived stress predicts allergy flares*. *Annals of Allergy, Asthma & Immunology: Official Publication of the American College of Allergy, Asthma, & Immunology* 2014;112(4):317-321. doi.org/10.1016/j.anai.2013.07.013.
- <sup>5</sup> Ferro M, Boyle M. Self-concept among youth with a chronic illness: A meta-analytic review. *Health Psychol* 2013;32;8: 839-848. Doi: 10.1037/a0031861.
- <sup>6</sup> Ferro MA, Van Lieshout RJ, Ohayon J, Scott JG. Emotional and behavioral problems in adolescents and young adults with food allergy. *Allergy* 2016;71:532-540. Doi: 10.1111/all.12829.
- <sup>7</sup> Harter S. *The Construction of the Self: A Developmental Perspective*. New York, NY, USA; Guilford, 1999.
- <sup>8</sup> Glazebrook C, McPherson AC, Macdonald IA, Swift JA, Ramsay C, Newbould R, Smyth A. Asthma as a barrier to children's physical activity: implications for body mass index and mental health. *Pediatrics* 2006;118;6:2443-2449. Doi: 10.1542/peds.2006-1846.

- 1  
2  
3  
4<sup>9</sup> Merikallio VJ, Mustalahti K, Remes ST, Valovirta EJ, Kaila M. Comparison of quality  
5  
6 of life between asthmatic and healthy school children. *Pediatr Allergy Immunol*  
7  
8 2005;16:332-340. Doi: 10.1111/j.1399-3038.2005.00286.x  
9
- 10<sup>10</sup> Everhart RS, Fiese BH. Asthma severity and child quality of life in pediatric asthma:  
11  
12 A systematic review. *Patient Educ Couns* 2009;75:162-168. Doi:  
13  
14 10.1016/j.pec.2008.10.001.  
15
- 16<sup>11</sup> Heintz D, Chalmers J, Nankervis H, Apfelbacher CJ. Eczema Trials: Quality of Life  
17  
18 Instruments Used and Their Relation to Patient-Reported Outcomes. A Systematic  
19  
20 Review. *Acta Derm Venereol* 2016;96:596-601. Doi: 10.2340/00015555-2322.  
21  
22
- 23<sup>12</sup> Gill TM, Feinstein AR. A critical appraisal of the quality of quality-of-life  
24  
25 measurements. *JAMA* 1994;272;8:619-626. Doi:10.1001/jama.1994.03520080061045.  
26  
27
- 28<sup>13</sup> Coffey, JK, Warren MT, Gottfried AV. Does infant happiness forecast adult life  
29  
30 satisfaction? Examining subjective well-being in the first quarter century of life. *J*  
31  
32 *Happiness Stud* 2015;16(6):1401-1421. doi 10.1007/s10902-014-9556-x.  
33
- 34<sup>14</sup> Sourander A, Helstelä L, Helenius H. Parent-adolescent agreement on emotional and  
35  
36 behavioral problems. *Soc Psychiatry Psychiatr Epidemiol* 1999;34:657-663.  
37
- 38<sup>15</sup> McQuaid EL, Farrow ML, Esteban CA, Jandasek BN, Rudders SA. Topical Review:  
39  
40 Pediatric Food Allergies among Diverse Children. *J Pediatr Psychol* 2016;41;4:391-  
41  
42 396. Doi: 10.1093/jpepsy/jsv051.  
43  
44
- 45<sup>16</sup> Shaw TE, Currie, GP, Koudelka CW, Simpson EL. Eczema prevalence in the United  
46  
47 States: Data from the 2003 national survey of children's health. *J Invest Dermatol*  
48  
49 2011;131;1:67-73. Doi: 10.1038/jid.2010.251.  
50
- 51<sup>17</sup> Diener E, Emmons RA, Larsen RJ, Griffin S. The satisfaction with life scale. *J Pers*  
52  
53 *Assess* 1985;49:71-75.  
54  
55  
56  
57  
58  
59  
60

1  
2  
3  
4 <sup>18</sup> Huebner SE. Further validation of the students' life satisfaction scale: The  
5 independence of satisfaction and affect ratings. *J Psychoed Assess* 1991;9:363-368. Doi:  
6 10.1177/073428299100900408.  
7  
8

9  
10 <sup>19</sup> Seligson JL, Huebner ES, Valois RF. Preliminary validation of the brief  
11 multidimensional students' life satisfaction scale (BMSLSS). *Soc Ind Res* 2003;61:121-  
12 145. doi: 10.1007/s10488-011-0385-5.  
13  
14

15  
16 <sup>20</sup> Children's worlds. 2017. <http://www.isciweb.org>.  
17

18  
19 <sup>21</sup> Lippman LH, Anderson Moore K, McIntosh H. *Positive indicators of child well-*  
20 *being: a conceptual framework, measures and methodological issues*. Innocenti  
21 Working Paper No. 2009-21; 2009. Florence, UNICEF Innocenti Research Centre.  
22  
23

24  
25 <sup>22</sup> McDougall J, Wright W, Nichols M, Miller L. Assessing the psychometric properties  
26 of both a global and a domain-specific perceived quality of life measure when used with  
27 youth who have chronic conditions. *Soc Indic Res* 2013;114:1243-1257. Doi  
28 10.1007/s11205-012-0200-z.  
29  
30  
31

32  
33  
34 <sup>23</sup> Asher MI, Weiland SK on behalf of the ISAAC steering committee. The international  
35 study of asthma and allergies in childhood (ISAAC). *Clin Exp Allergy* 1998;28 Supp  
36 5:52-66.  
37  
38

39  
40  
41 <sup>24</sup> Nwaru BI, Lumia M, Kaila M, Luukkainen P, Tapanainen H, Erkkola M. Validation  
42 of the Finnish ISAAC questionnaire on asthma against anti-asthmatic medication  
43 reimbursement database in 5-year-old children. *Clin Respir J* 2011;5:211-8. Doi:  
44 10.1111/j.1752-699X.2010.00222.x.  
45  
46  
47

48  
49 <sup>25</sup> Flohr C, Weinmayr G, Weiland SK (deceased), Addo-Yobo E, Annesi-Maesano I.  
50 How well do questionnaires perform compared with physical examination in detecting  
51 flexural eczema? Findings from the International Study of Asthma and Allergies in  
52  
53  
54  
55  
56  
57  
58  
59  
60

1  
2  
3  
4 Childhood (ISAAC) Phase Two. *Br J Dermatol* 2009;161:846-53. Doi: 10.1111/j.1365-  
5 2133.2009.09261.x.

6  
7  
8 <sup>26</sup> Jousilahti P, Haahtela T, Laatikainen T, Mäkelä M, Vartiainen E. Asthma and  
9  
10 respiratory allergy prevalence is still increasing among Finnish young adults. *Eur*  
11  
12 *Respir J* 2016;47:985-987. Doi:10.1183/13993003.01702-2015.

13  
14 <sup>27</sup> Asher MI, Montefort S, Björkstén B, Lai CK, Strachan DP, Weiland SK, et al.  
15  
16 Worldwide time trends in the prevalence of symptoms of asthma, allergic  
17  
18 rhinoconjunctivitis, and eczema in childhood: ISAAC Phases One and Three repeat  
19  
20 multicountry cross-sectional surveys. *Lancet* 2006;368:733-43. Doi: 10.1016/S0140-  
21  
22 6736(06)69283-0.

23  
24  
25 <sup>28</sup> Masoli M, Fabian D, Holt S, Beasley R for the Global Initiative for Asthma (GINA)  
26  
27 Program. The global burden of asthma: executive summary of the GINA dissemination  
28  
29 committee report. *Allergy* 2004;59:469-478. Doi: 10.1111/j.1398-9995.2004.00526.x.

30  
31  
32 <sup>29</sup> NCD Risk factor collaboration. Trends in adult body-mass index in 200 countries  
33  
34 from 1975 to 2014: a pooled analysis of 1698 population-based measurement studies  
35  
36 with 19.2 million participants. *Lancet* 2016;387:1377-96. Doi: 10.1016/S0140-  
37  
38 6736(16)30054-X.

39  
40  
41 <sup>30</sup> Campbell DE, Boyle RJ, Thornton CA, Prescott SL. Mechanisms of allergic disease –  
42  
43 environmental and genetic determinants for the development of allergy. *Clin Exp*  
44  
45 *Allergy* 2015;45:844-858. Doi: 10.1111/cea.12531.

46  
47  
48 <sup>31</sup> Hersoug L-G, Linneberg A. The link between the epidemics of obesity and allergic  
49  
50 diseases: does obesity induce decreased immune tolerance? *Allergy* 2007;62:1205-13.  
51  
52 Doi: 10.1111/j.1398-9995.2007.01506.x.

- 1  
2  
3  
4 <sup>32</sup> Baiardini I, Braido F, Giardini A, Majani G, Cacciola C, Rogaku A, Scordamaglia A,  
5  
6 Canonica GW. Adherence to treatment: assessment of an unmet need in asthma. *J*  
7  
8 *Investig Allergol Clin Immunol* 2006;16(4):218-23. Free full text.  
9
- 10 <sup>33</sup> Teyhan A, Galobardes B, Henderson J. Child allergic symptoms and well-being at  
11  
12 school: Findings from ALSPAC, a UK cohort study. *J PLoS ONE*.  
13  
14 2015;10(8):e0135271. doi:10.1371/journal.pone.0135271.  
15
- 16 <sup>34</sup> Rutter M, Rutter M. *Developing minds. Challenge and continuity across the life span*.  
17  
18 England; Clays Ltd, 1993.  
19
- 20 <sup>35</sup> Juniper EF. How important is quality of life in pediatric asthma? *Pediatr Pulmonol*  
21  
22 *Suppl* 1997;15:17-21. Doi: 10.1002/(SICI)1099-0496(199709)15+<17::AID-  
23  
24 PPUL5>3.0.CO;2-O.  
25  
26
- 27 <sup>36</sup> Tuckman A. The Potential Psychological Impact of Skin Conditions. *Dermatol Ther*  
28  
29 (Heidelb)2017;7(Suppl 1):53-57. doi: 10.1007/s13555-016-0169-7.  
30  
31
- 32 <sup>37</sup> Osman LR, Caldman C, Robertson R, et al. Symptoms, quality of life, and health  
33  
34 service contact among young adults with mild asthma. *Am J Respir Crit Care Med*  
35  
36 2000;61:498-503.  
37
- 38 <sup>38</sup> Jago R, Searl A, Henderson AJ, Turner KM. Designing a physical activity  
39  
40 intervention for children with asthma: a qualitative study of the views of healthcare  
41  
42 professionals, parents and children with asthma. *BMJ Open* 2017;24:7(3):e014020.doi:  
43  
44 10.1136/bmjopen-2016-014020.  
45
- 46 <sup>39</sup> Cui W, Zack MM, HS Zahran. Health-related quality of life and asthma among  
47  
48 United States adolescents. *J Pediatr* 2015;166(2):358-364. Doi:  
49  
50 10.1016/j.jpeds.2014.10.005.  
51  
52  
53  
54  
55  
56  
57  
58  
59  
60

1  
2  
3  
4  
5  
6  
7  
8  
9  
10  
11  
12  
13  
14  
15  
16  
17  
18  
19  
20  
21  
22  
23  
24  
25  
26  
27  
28  
29  
30  
31  
32  
33  
34  
35  
36  
37  
38  
39  
40  
41  
42  
43  
44  
45  
46  
47  
48  
49  
50  
51  
52  
53  
54  
55  
56  
57  
58  
59  
60

---

<sup>40</sup> Akeson N, Worth A, Sheikh A. The psychosocial impact of anaphylaxis on young people and their parents. *Clin Exp Allergy* 2007;37:1213-20. Doi: 10.1111/j.1365-2222.2007.02758.x.

For peer review only

## STROBE Statement—checklist of items that should be included in reports of observational studies

|                                | Item No | Recommendation                                                                                                                                                                                                                                                                                                                                                                                                                                                                                                                                                                                                                                                                                                         |
|--------------------------------|---------|------------------------------------------------------------------------------------------------------------------------------------------------------------------------------------------------------------------------------------------------------------------------------------------------------------------------------------------------------------------------------------------------------------------------------------------------------------------------------------------------------------------------------------------------------------------------------------------------------------------------------------------------------------------------------------------------------------------------|
| ✓ <b>Title and abstract</b>    | 1       | (a) Indicate the study's design with a commonly used term in the title or the abstract, p. 1<br><br>(b) Provide in the abstract an informative and balanced summary of what was done and what was found, p. 2                                                                                                                                                                                                                                                                                                                                                                                                                                                                                                          |
| <b>Introduction</b>            |         |                                                                                                                                                                                                                                                                                                                                                                                                                                                                                                                                                                                                                                                                                                                        |
| ✓ Background/rationale         | 2       | Explain the scientific background and rationale for the investigation being reported, p. 4                                                                                                                                                                                                                                                                                                                                                                                                                                                                                                                                                                                                                             |
| ✓ Objectives                   | 3       | State specific objectives, including any prespecified hypotheses, p. 4                                                                                                                                                                                                                                                                                                                                                                                                                                                                                                                                                                                                                                                 |
| <b>Methods</b>                 |         |                                                                                                                                                                                                                                                                                                                                                                                                                                                                                                                                                                                                                                                                                                                        |
| ✓ Study design                 | 4       | Present key elements of study design early in the paper, p. 5                                                                                                                                                                                                                                                                                                                                                                                                                                                                                                                                                                                                                                                          |
| ✓ Setting                      | 5       | Describe the setting, locations, and relevant dates, including periods of recruitment, exposure, follow-up, and data collection, p. 5                                                                                                                                                                                                                                                                                                                                                                                                                                                                                                                                                                                  |
| ✓ Participants                 | 6       | (a) <i>Cohort study</i> —Give the eligibility criteria, and the sources and methods of selection of participants. Describe methods of follow-up<br><br><i>Case-control study</i> —Give the eligibility criteria, and the sources and methods of case ascertainment and control selection. Give the rationale for the choice of cases and controls<br><br><i>Cross-sectional study</i> —Give the eligibility criteria, and the sources and methods of selection of participants, p. 5<br><br>(b) <i>Cohort study</i> —For matched studies, give matching criteria and number of exposed and unexposed<br><br><i>Case-control study</i> —For matched studies, give matching criteria and the number of controls per case |
| ✓ Variables                    | 7       | Clearly define all outcomes, exposures, predictors, potential confounders, and effect modifiers. Give diagnostic criteria, if applicable, p. 5-7                                                                                                                                                                                                                                                                                                                                                                                                                                                                                                                                                                       |
| ✓ Data sources/<br>measurement | 8*      | For each variable of interest, give sources of data and details of methods of assessment (measurement). Describe comparability of assessment methods if there is more than one group, p. 5-7                                                                                                                                                                                                                                                                                                                                                                                                                                                                                                                           |
| ✓ Bias                         | 9       | Describe any efforts to address potential sources of bias, p. 7                                                                                                                                                                                                                                                                                                                                                                                                                                                                                                                                                                                                                                                        |

|    |                          |    |                                                                          |
|----|--------------------------|----|--------------------------------------------------------------------------|
| 1  | ✓ Study size             | 10 | Explain how the study size was arrived at, p. 5                          |
| 2  |                          |    |                                                                          |
| 3  | ✓ Quantitative variables | 11 | Explain how quantitative variables were handled in the analyses.         |
| 4  |                          |    | If applicable, describe which groupings were chosen and why, p.          |
| 5  |                          |    | 7                                                                        |
| 6  |                          |    |                                                                          |
| 7  | ✓ Statistical methods    | 12 | (a) Describe all statistical methods, including those used to            |
| 8  |                          |    | control for confounding, p. 7                                            |
| 9  |                          |    |                                                                          |
| 10 |                          |    | (b) Describe any methods used to examine subgroups and                   |
| 11 |                          |    | interactions                                                             |
| 12 |                          |    |                                                                          |
| 13 |                          |    | (c) Explain how missing data were addressed                              |
| 14 |                          |    |                                                                          |
| 15 |                          |    | (d) <i>Cohort study</i> —If applicable, explain how loss to follow-up    |
| 16 |                          |    | was addressed                                                            |
| 17 |                          |    |                                                                          |
| 18 |                          |    | <i>Case-control study</i> —If applicable, explain how matching of cases  |
| 19 |                          |    | and controls was addressed                                               |
| 20 |                          |    |                                                                          |
| 21 |                          |    | <i>Cross-sectional study</i> —If applicable, describe analytical methods |
| 22 |                          |    | taking account of sampling strategy, p. 5                                |
| 23 |                          |    |                                                                          |
| 24 |                          |    | (e) Describe any sensitivity analyses                                    |

Continued on next page



**Results**

|   |                  |     |                                                                                                                                                                                                                    |
|---|------------------|-----|--------------------------------------------------------------------------------------------------------------------------------------------------------------------------------------------------------------------|
| ✓ | Participants     | 13* | (a) Report numbers of individuals at each stage of study—eg numbers potentially eligible, examined for eligibility, confirmed eligible, included in the study, completing follow-up, and analysed, p. 12           |
|   |                  |     | (b) Give reasons for non-participation at each stage                                                                                                                                                               |
|   |                  |     | (c) Consider use of a flow diagram                                                                                                                                                                                 |
| ✓ | Descriptive data | 14* | (a) Give characteristics of study participants (eg demographic, clinical, social) and information on exposures and potential confounders, p. 7-8, 12                                                               |
|   |                  |     | (b) Indicate number of participants with missing data for each variable of interest                                                                                                                                |
|   |                  |     | (c) <i>Cohort study</i> —Summarise follow-up time (eg, average and total amount)                                                                                                                                   |
| ✓ | Outcome data     | 15* | <i>Cohort study</i> —Report numbers of outcome events or summary measures over time                                                                                                                                |
|   |                  |     | <i>Case-control study</i> —Report numbers in each exposure category, or summary measures of exposure                                                                                                               |
|   |                  |     | <i>Cross-sectional study</i> —Report numbers of outcome events or summary measures, p. 5                                                                                                                           |
| ✓ | Main results     | 16  | (a) Give unadjusted estimates and, if applicable, confounder-adjusted estimates and their precision (eg, 95% confidence interval). Make clear which confounders were adjusted for and why they were included, p.12 |
|   |                  |     | (b) Report category boundaries when continuous variables were categorized                                                                                                                                          |
|   |                  |     | (c) If relevant, consider translating estimates of relative risk into absolute risk for a meaningful time period                                                                                                   |
| ✓ | Other analyses   | 17  | Report other analyses done—eg analyses of subgroups and interactions, and sensitivity analyses                                                                                                                     |

**Discussion**

|   |                  |    |                                                                                                                                                                                     |
|---|------------------|----|-------------------------------------------------------------------------------------------------------------------------------------------------------------------------------------|
| ✓ | Key results      | 18 | Summarise key results with reference to study objectives, p. 8-10                                                                                                                   |
| ✓ | Limitations      | 19 | Discuss limitations of the study, taking into account sources of potential bias or imprecision. Discuss both direction and magnitude of any potential bias, p. 10                   |
| ✓ | Interpretation   | 20 | Give a cautious overall interpretation of results considering objectives, limitations, multiplicity of analyses, results from similar studies, and other relevant evidence, p. 9-10 |
| ✓ | Generalisability | 21 | Discuss the generalisability (external validity) of the study results, p. 9                                                                                                         |

**Other information**

- 1  
2  
3  
4  
5  
6  
7  
8  
9  
10  
11  
12  
13  
14  
15  
16  
17  
18  
19  
20  
21  
22  
23  
24  
25  
26  
27  
28  
29  
30  
31  
32  
33  
34  
35  
36  
37  
38  
39  
40  
41  
42  
43  
44  
45  
46  
47  
48  
49  
50  
51  
52  
53  
54  
55  
56  
57  
58  
59  
60
- ✓ Funding 22 Give the source of funding and the role of the funders for the present study and, if applicable, for the original study on which the present article is based, p. 11

\*Give information separately for cases and controls in case-control studies and, if applicable, for exposed and unexposed groups in cohort and cross-sectional studies.

**Note:** An Explanation and Elaboration article discusses each checklist item and gives methodological background and published examples of transparent reporting. The STROBE checklist is best used in conjunction with this article (freely available on the Web sites of PLoS Medicine at <http://www.plosmedicine.org/>, Annals of Internal Medicine at <http://www.annals.org/>, and Epidemiology at <http://www.epidem.com/>). Information on the STROBE Initiative is available at [www.strobe-statement.org](http://www.strobe-statement.org).
